# Supplementary material
Source: PubMed Central journal article supplement (PMC9362633)

**rstudent**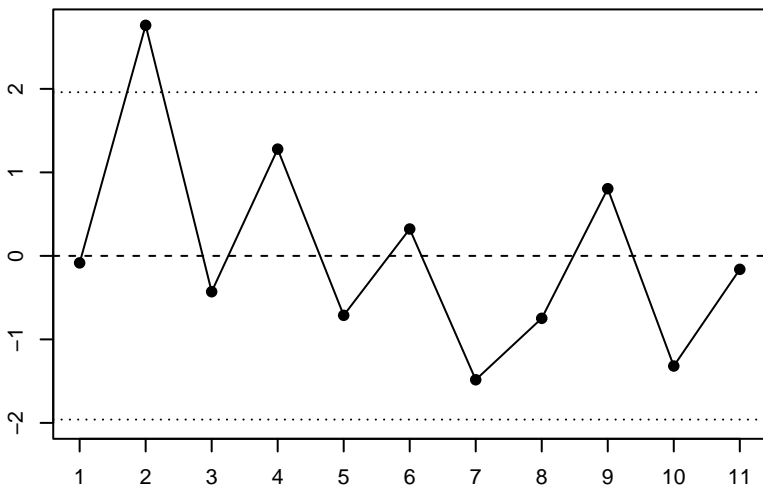**dffits**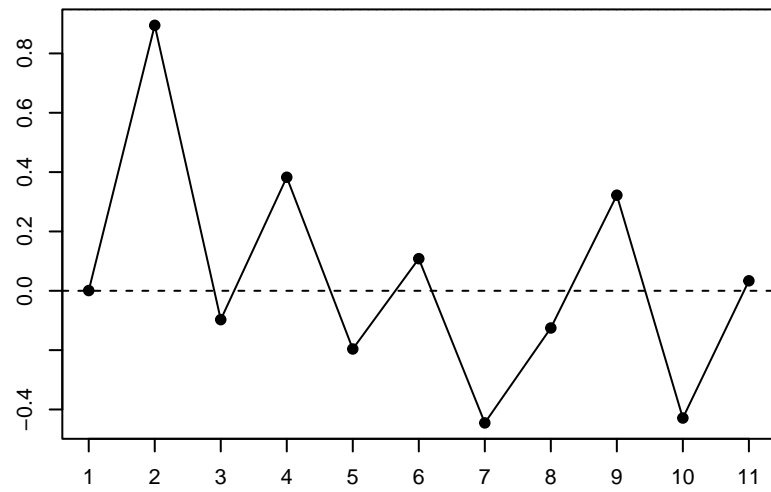**cook.d**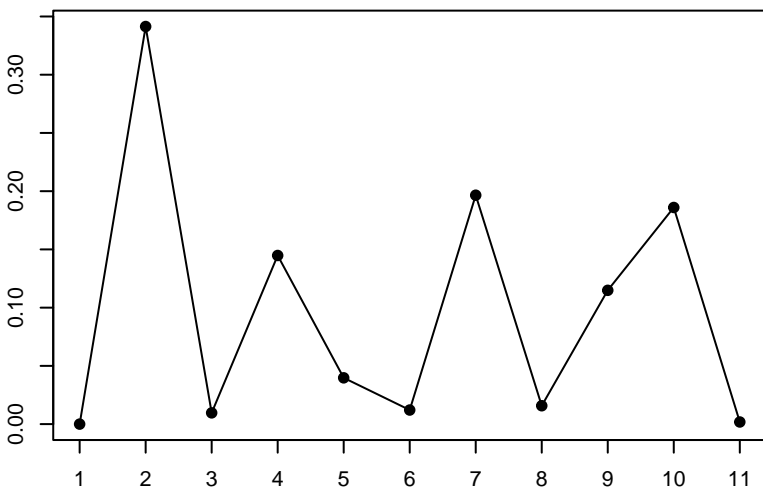**cov.r**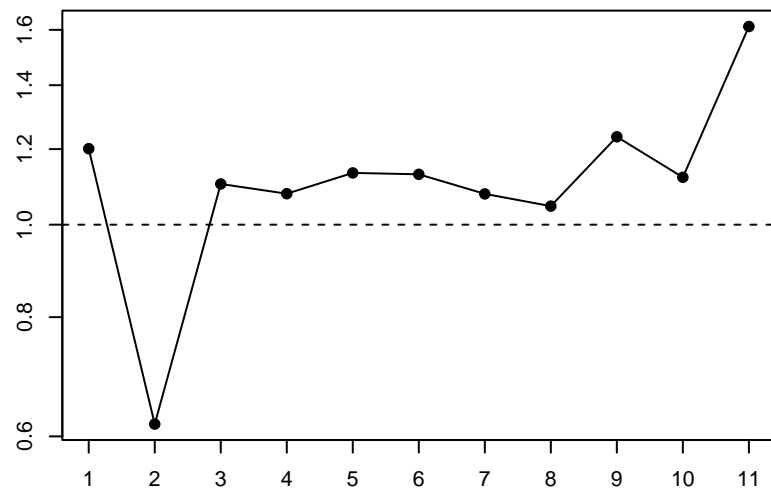**tau2.del**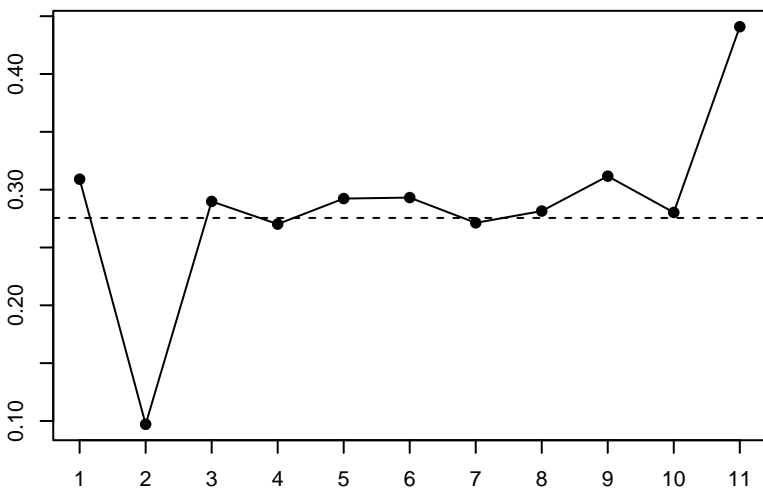**QE.del**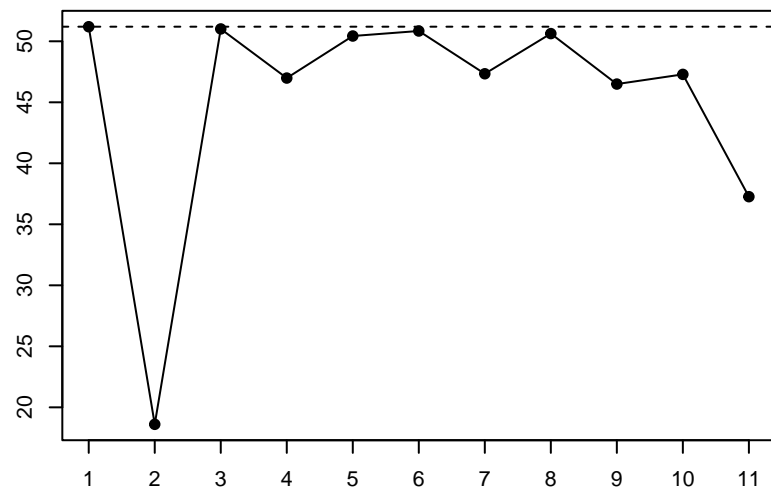**hat**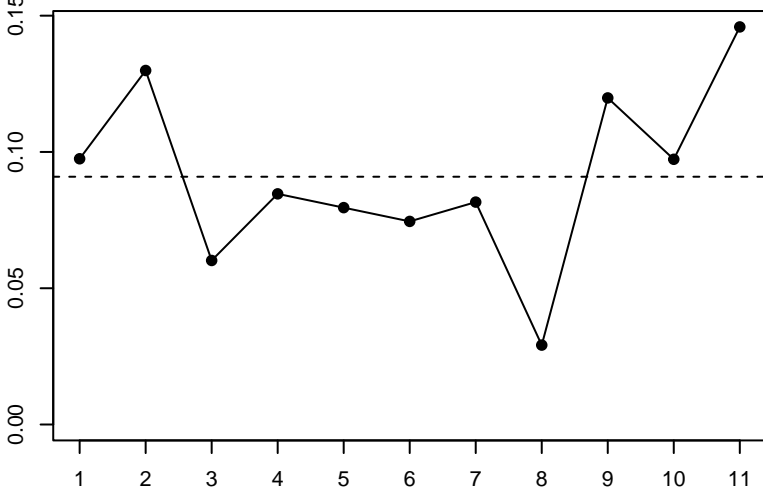**weight**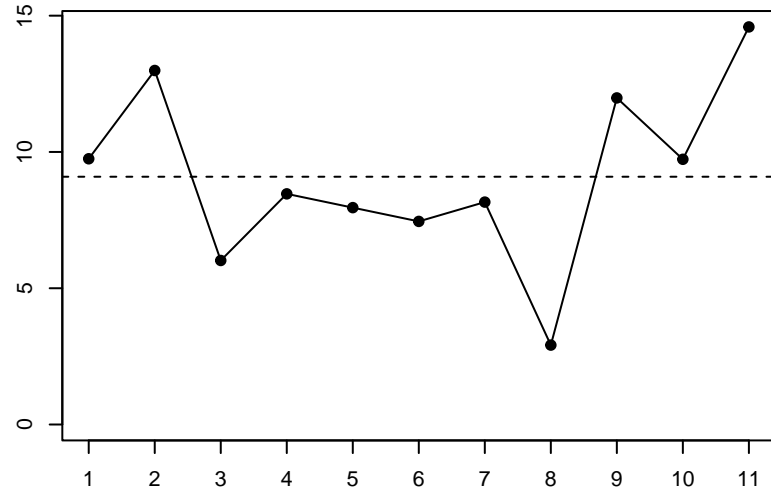

Supplement: 467_2022_5701_MOESM10_ESM.pdf [file 467_2022_5701_MOESM10_ESM.pdf]

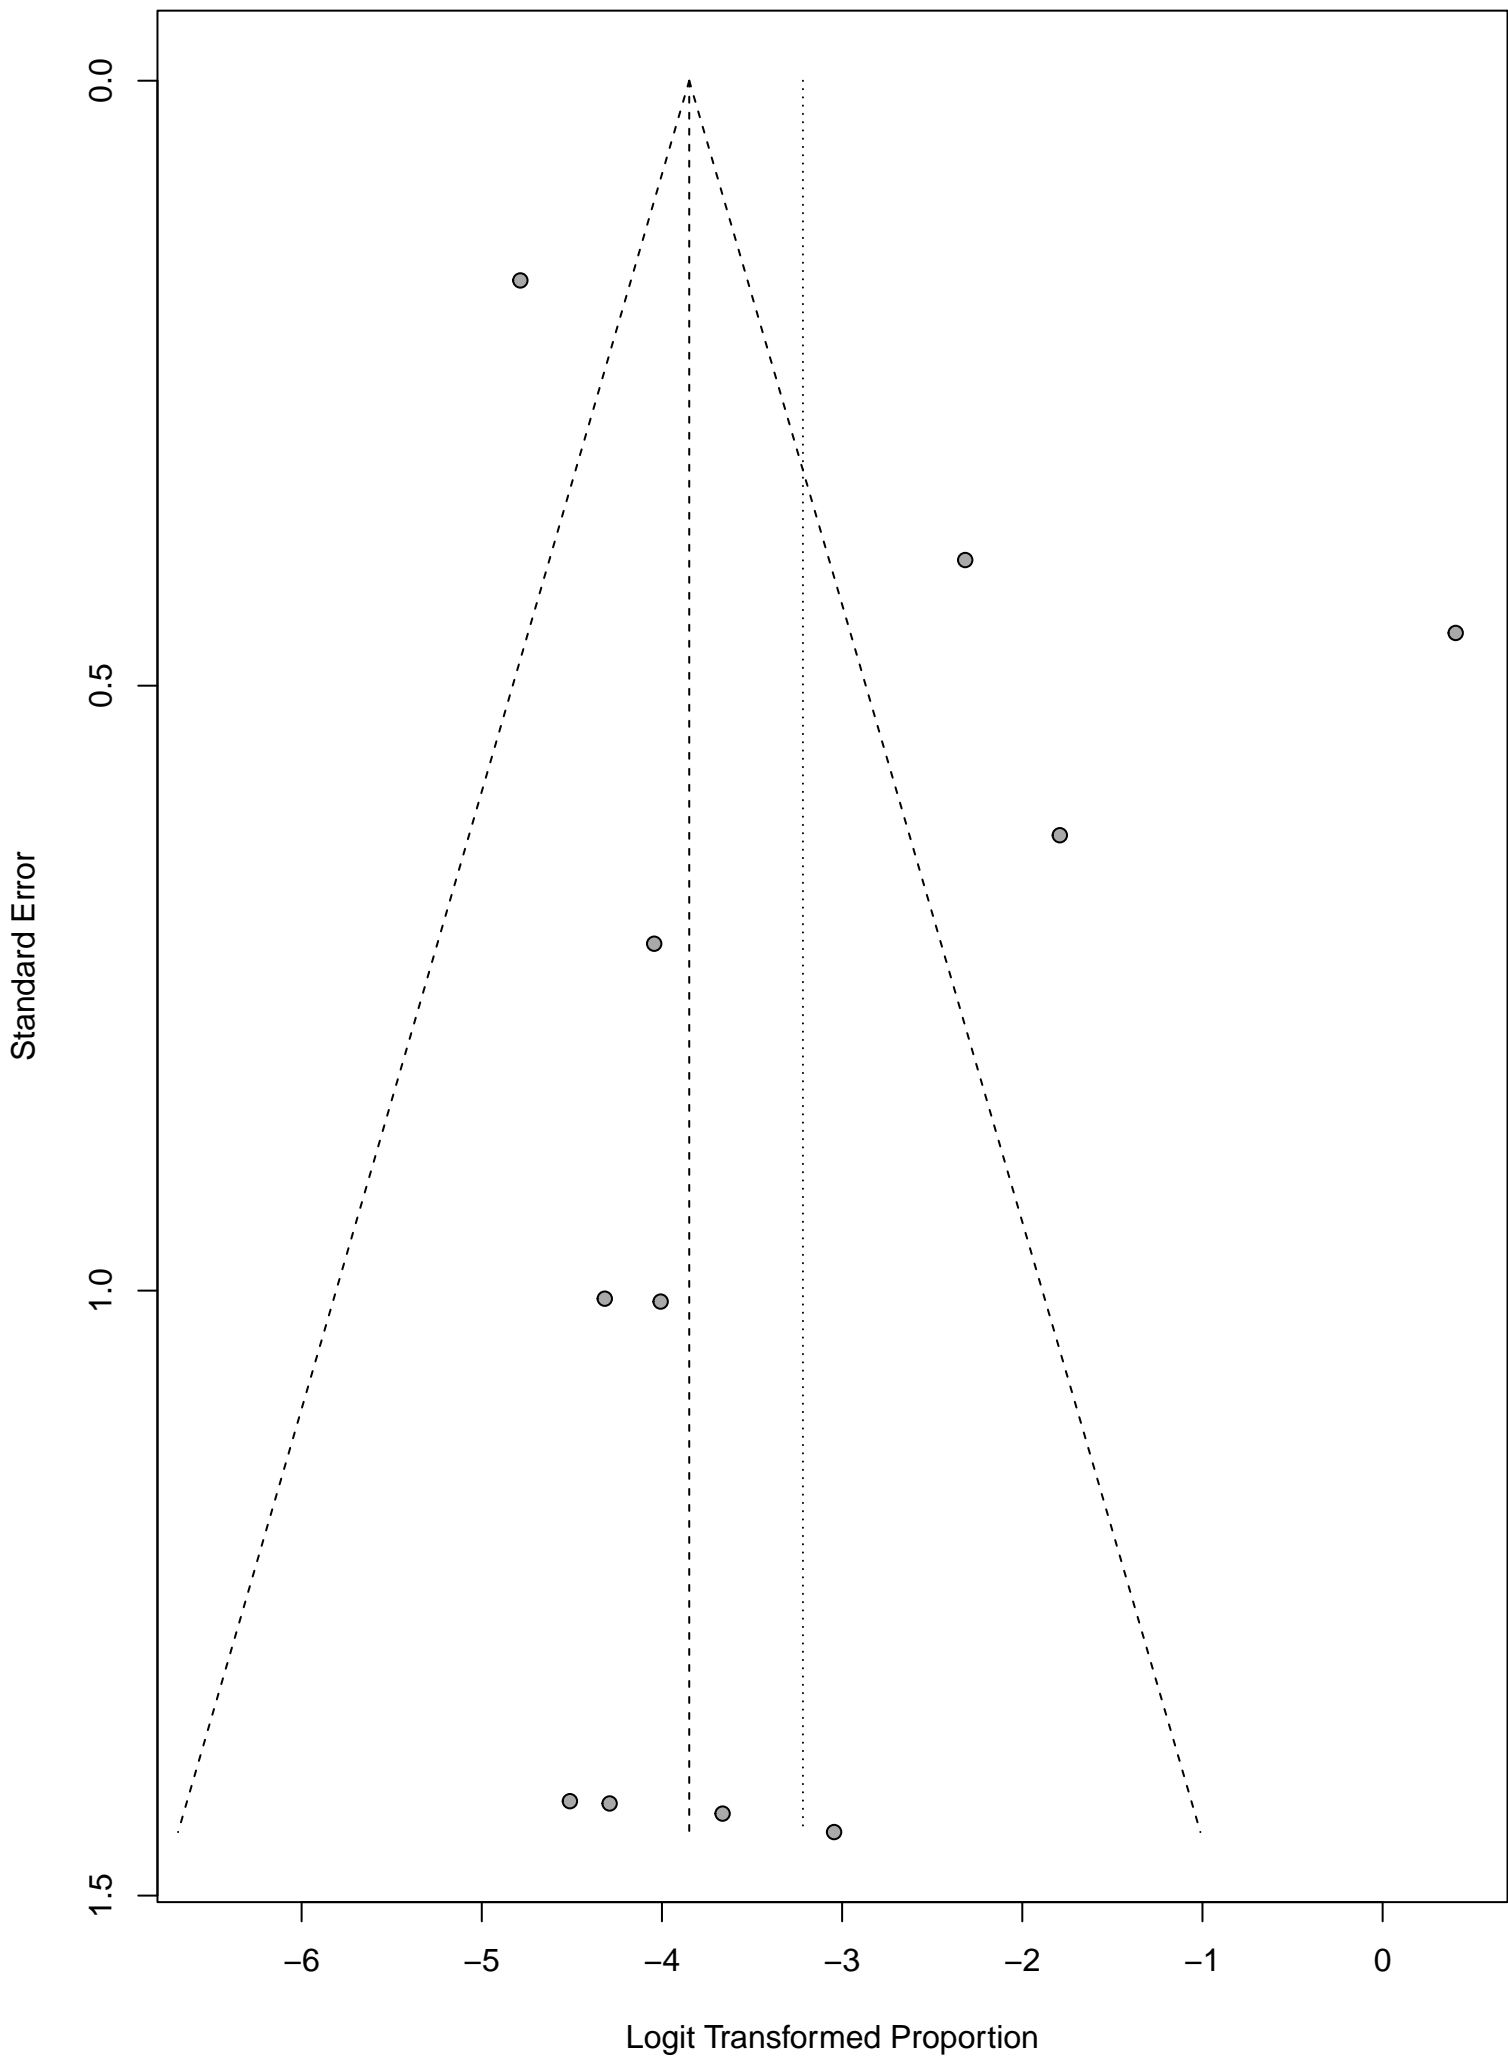

Supplement: 467_2022_5701_MOESM11_ESM.pdf [file 467_2022_5701_MOESM11_ESM.pdf]

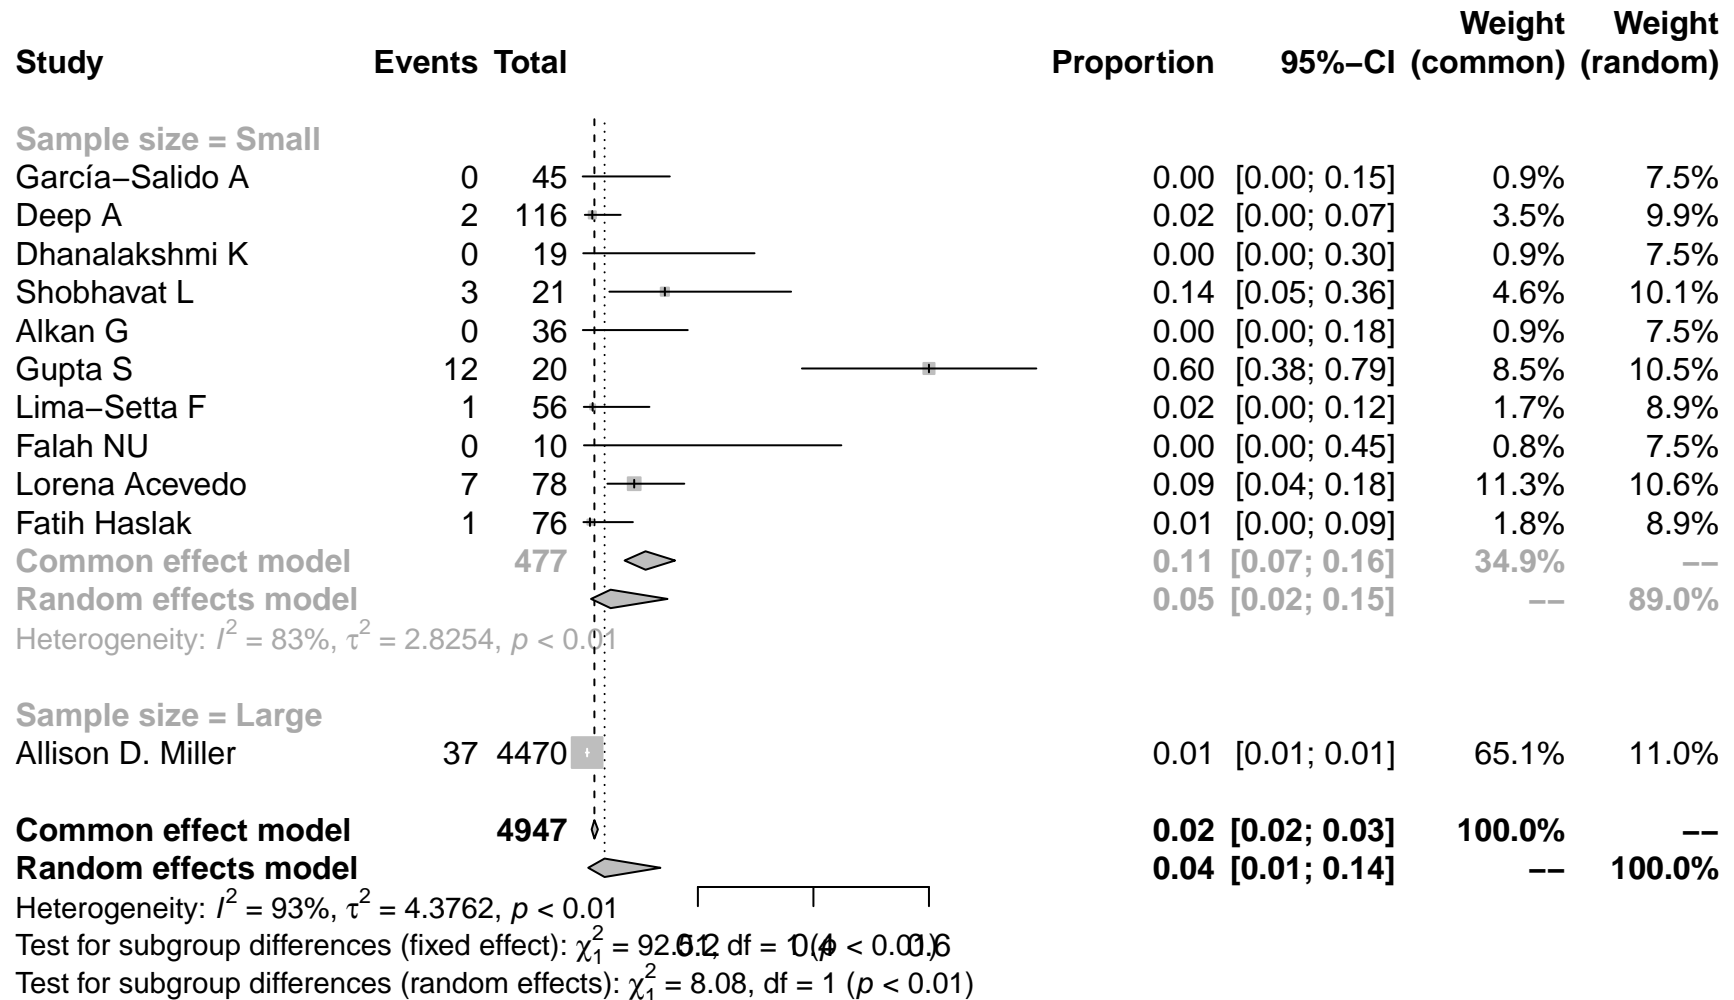

Supplement: 467_2022_5701_MOESM12_ESM.pdf [file 467_2022_5701_MOESM12_ESM.pdf]

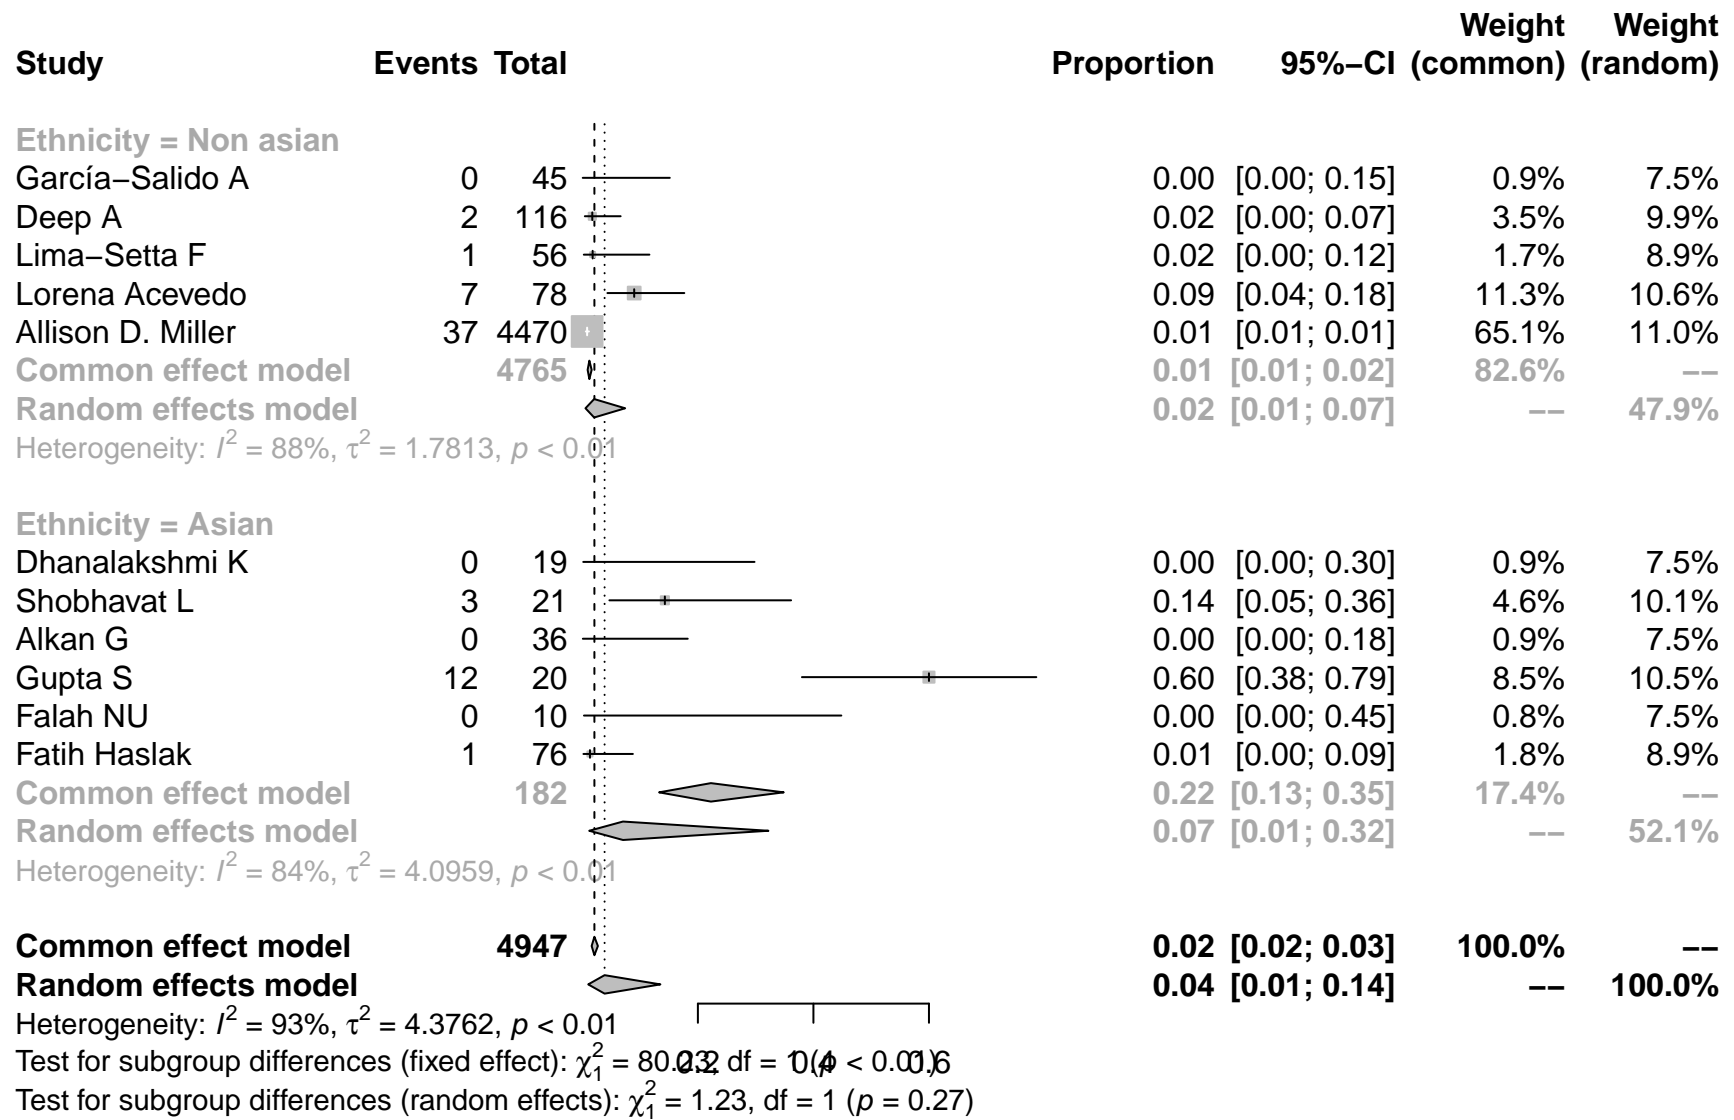

Supplement: 467_2022_5701_MOESM13_ESM.pdf [file 467_2022_5701_MOESM13_ESM.pdf]

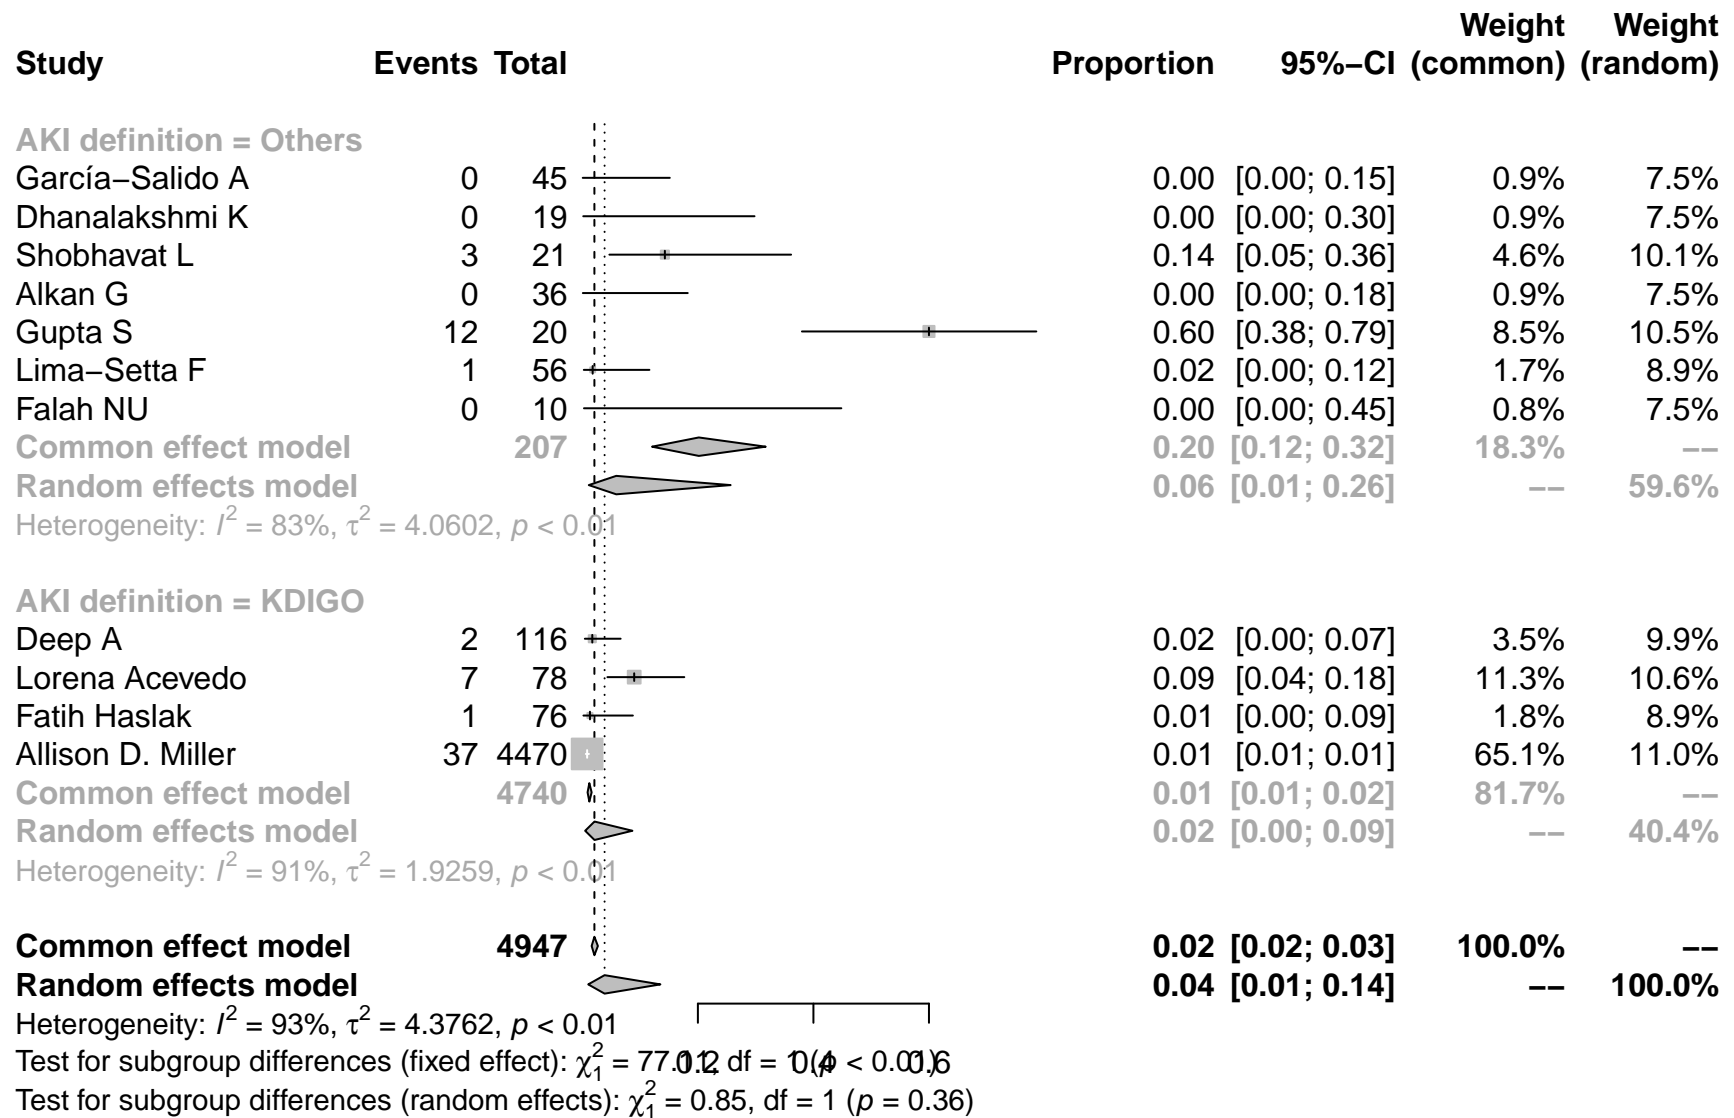

Supplement: 467_2022_5701_MOESM14_ESM.pdf [file 467_2022_5701_MOESM14_ESM.pdf]

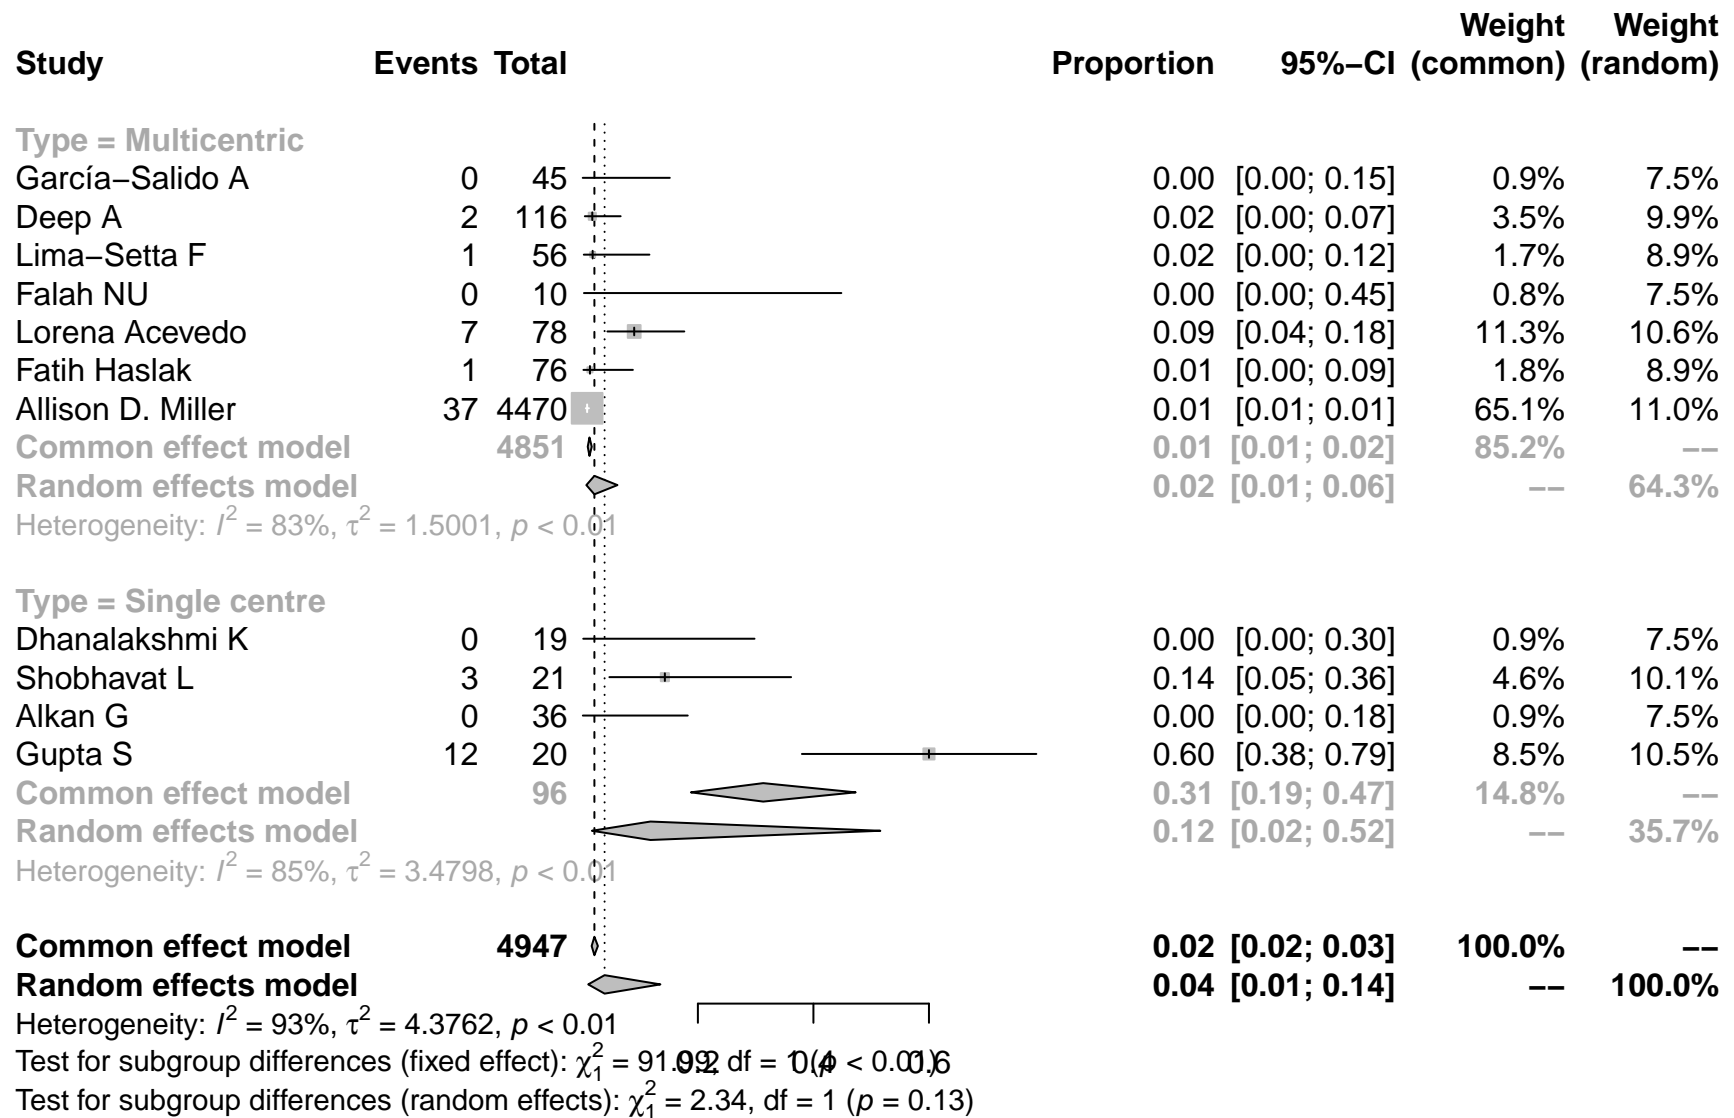

Supplement: 467_2022_5701_MOESM15_ESM.pdf [file 467_2022_5701_MOESM15_ESM.pdf]

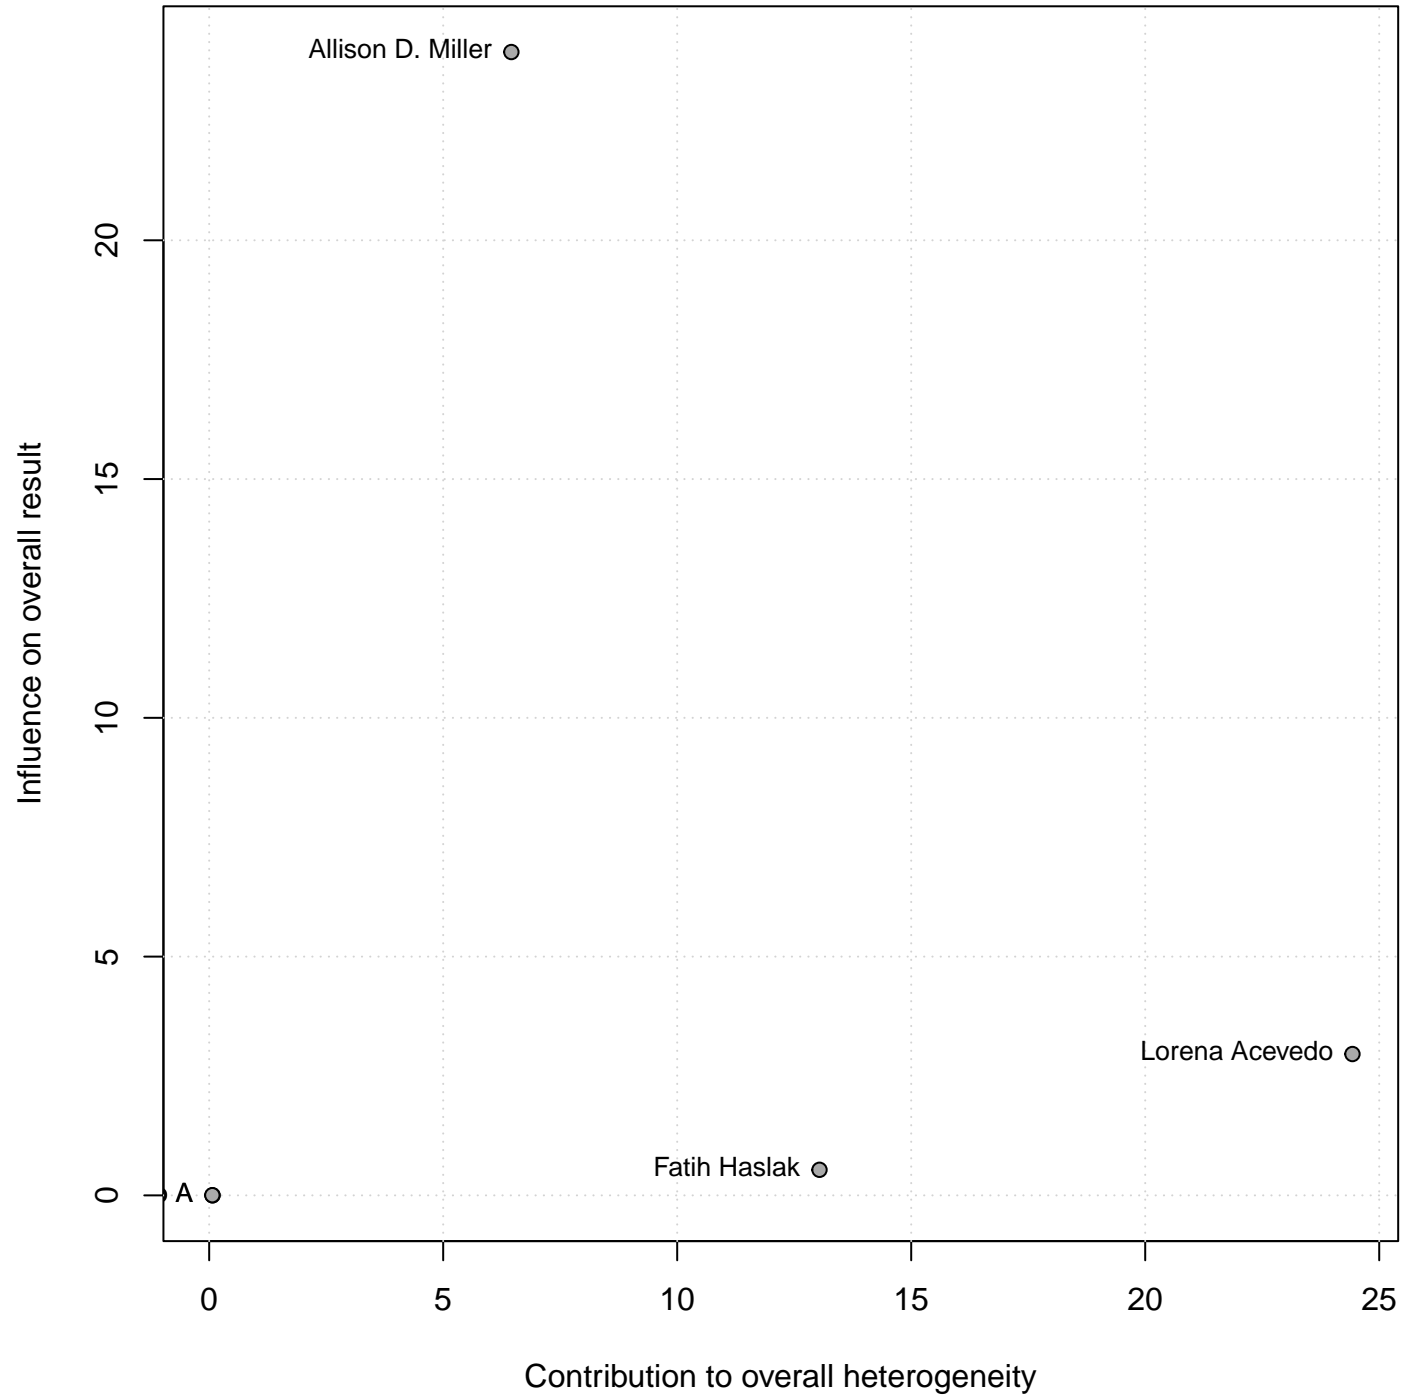

Supplement: 467_2022_5701_MOESM16_ESM.pdf [file 467_2022_5701_MOESM16_ESM.pdf]

**rstudent**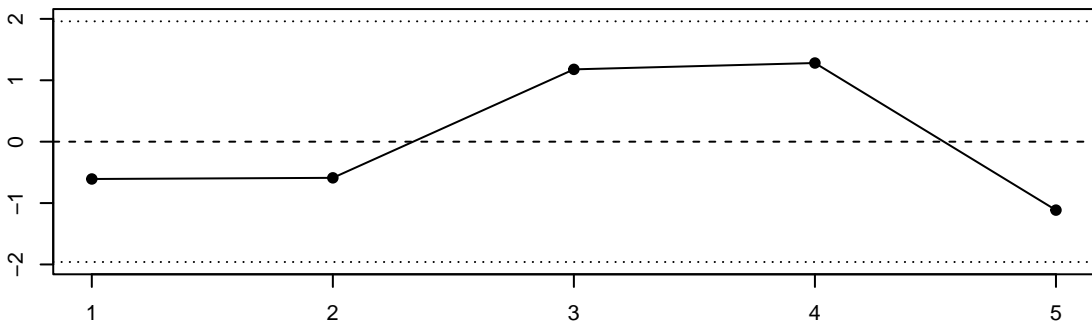**dffits**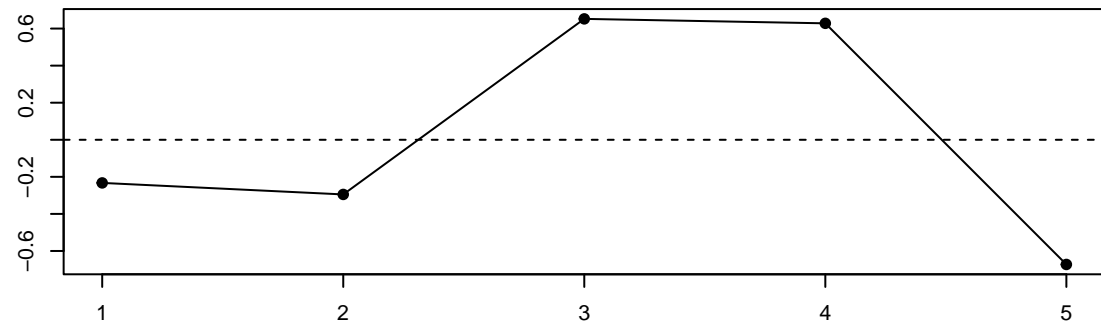**cook.d**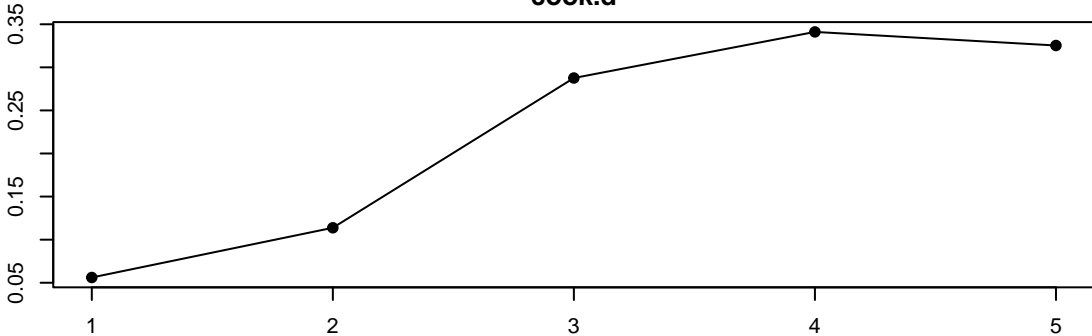**cov.r**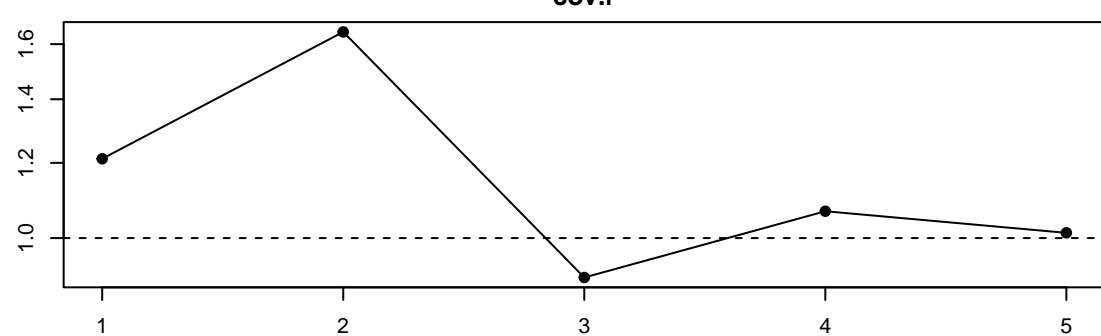**tau2.del**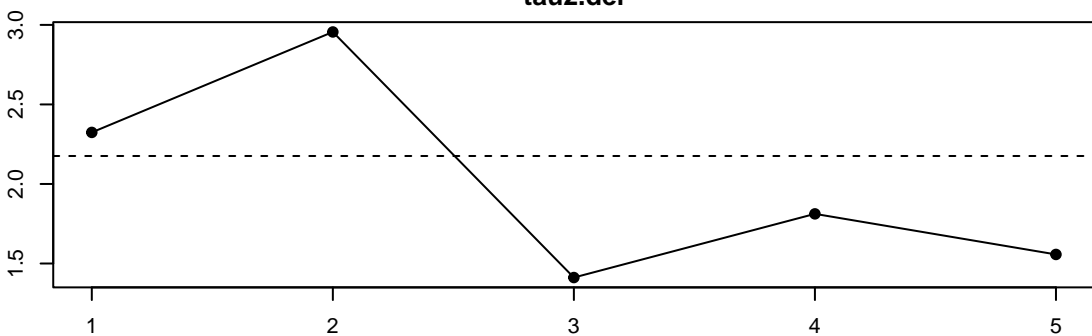**QE.del**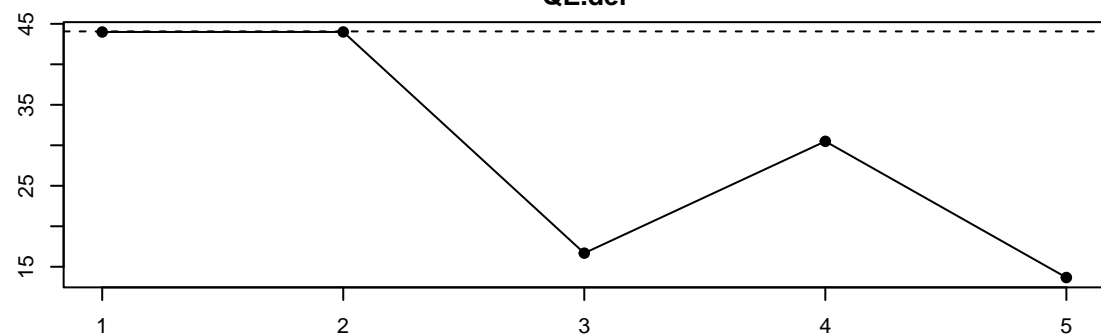**hat**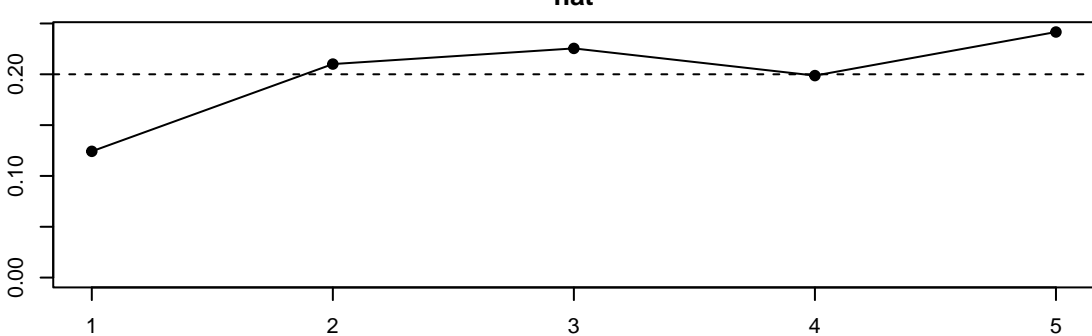**weight**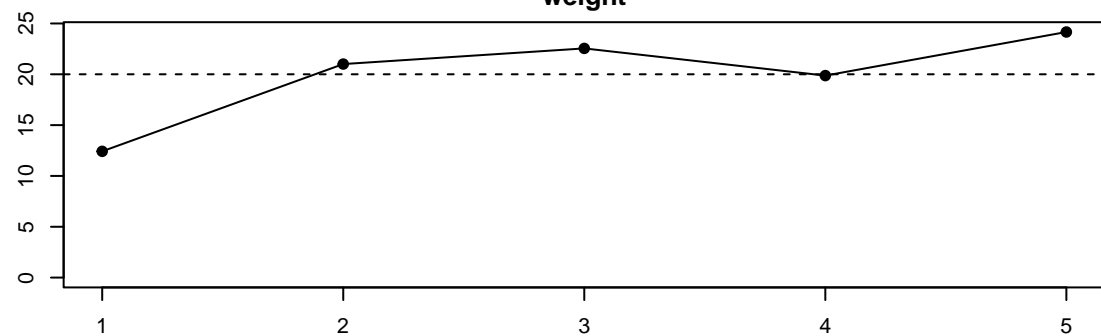

Supplement: 467_2022_5701_MOESM17_ESM.pdf [file 467_2022_5701_MOESM17_ESM.pdf]

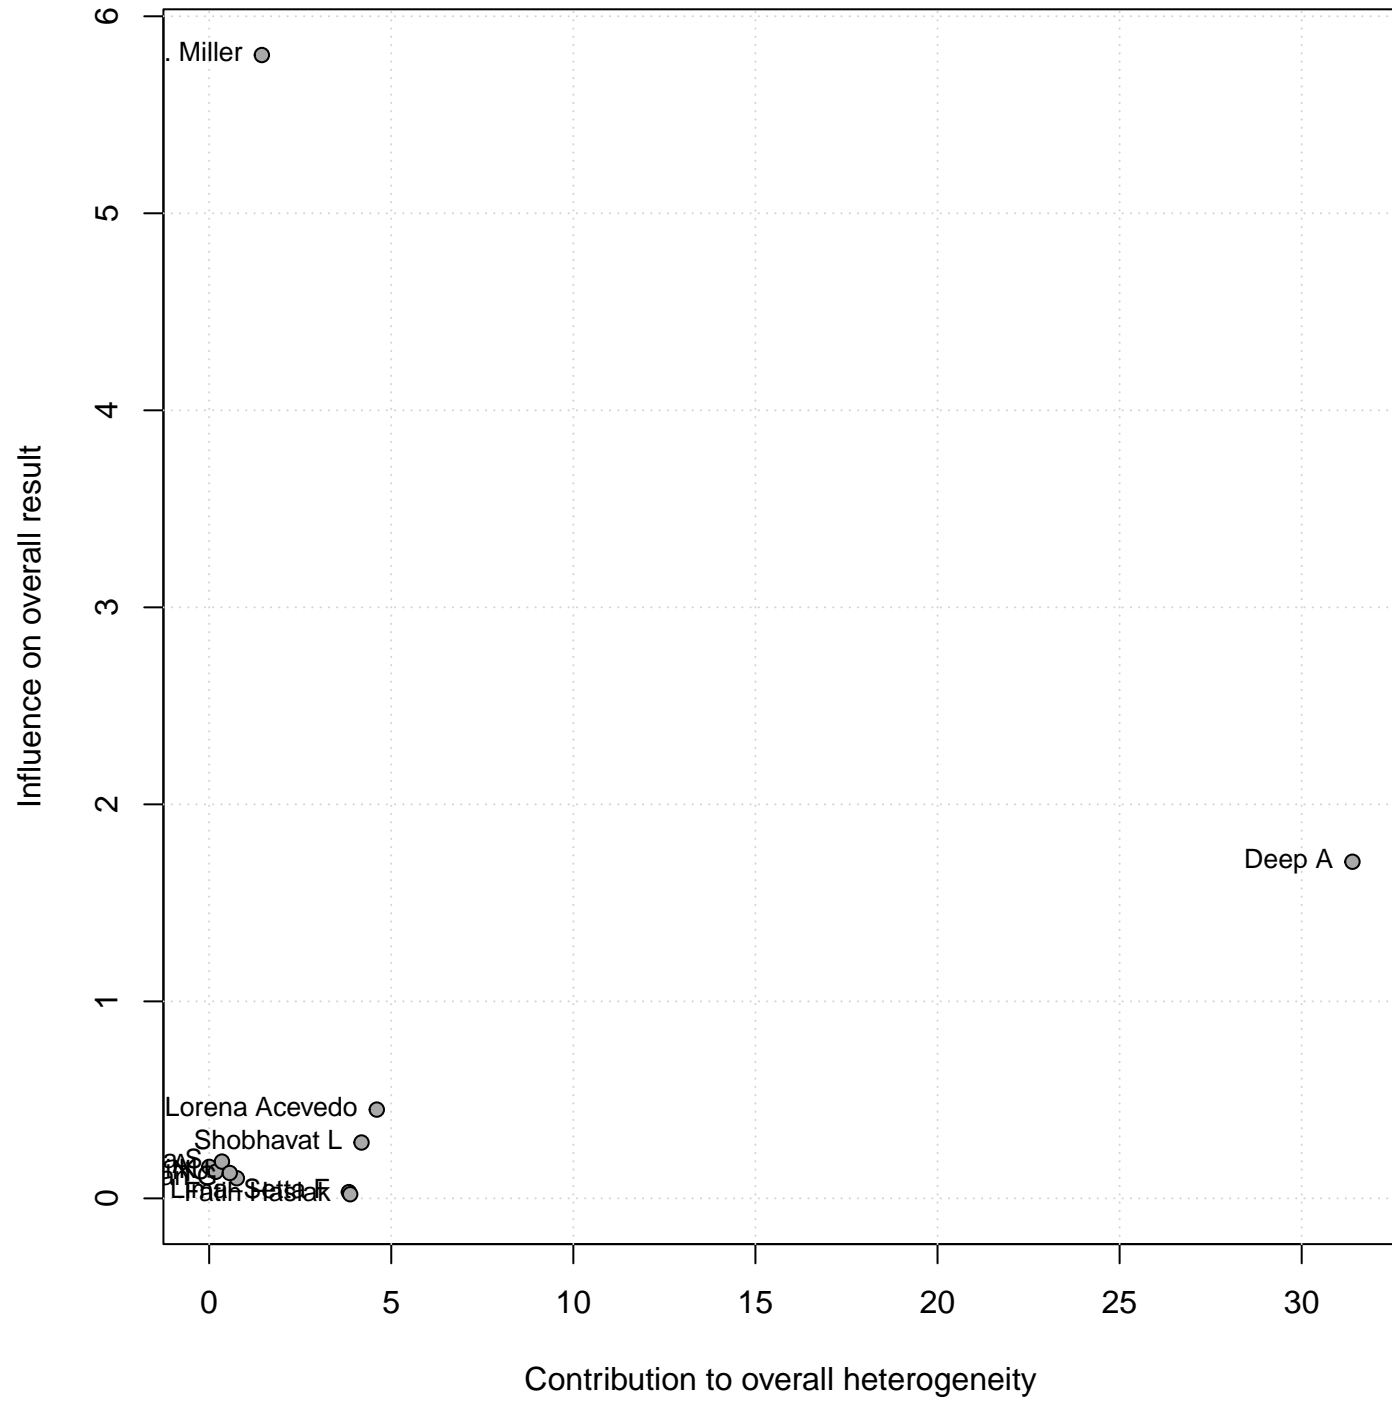

Supplement: 467_2022_5701_MOESM2_ESM.pdf [file 467_2022_5701_MOESM2_ESM.pdf]

**rstudent**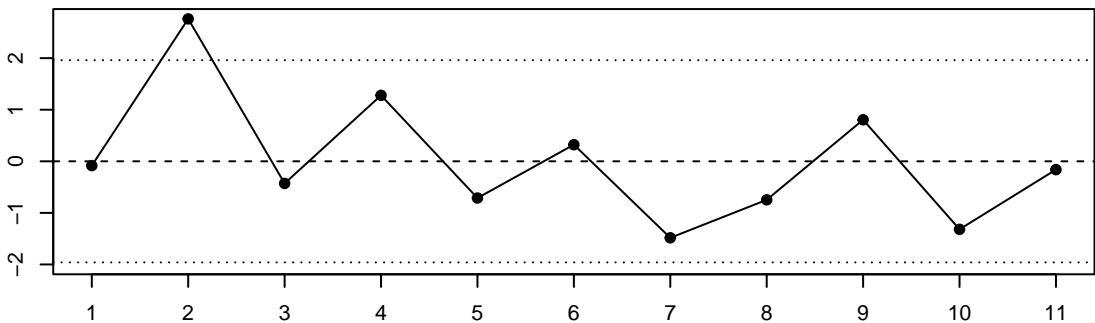**dffits**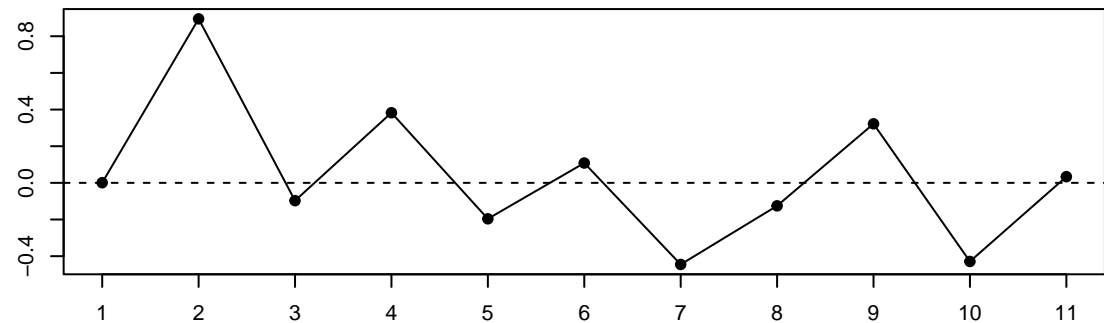**cook.d**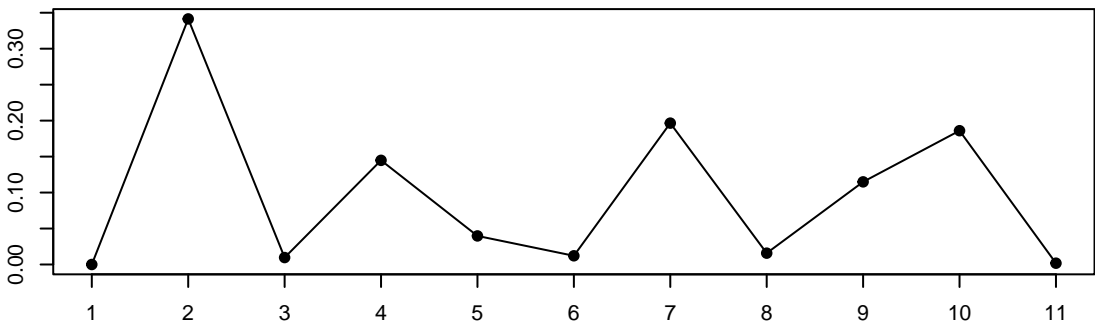**cov.r**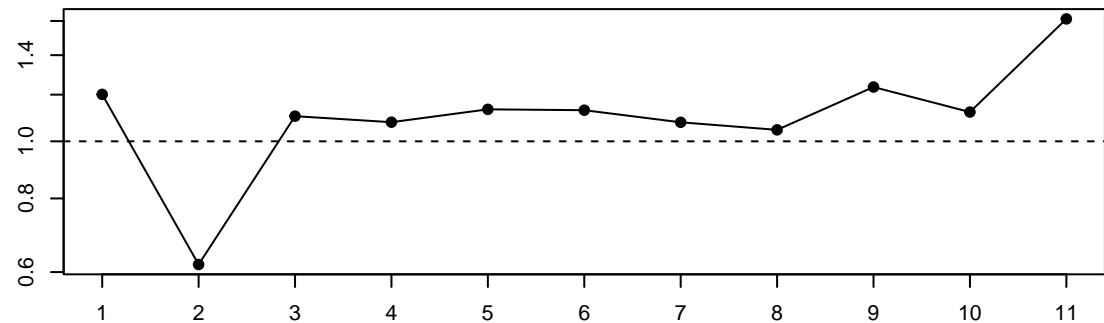**tau2.del**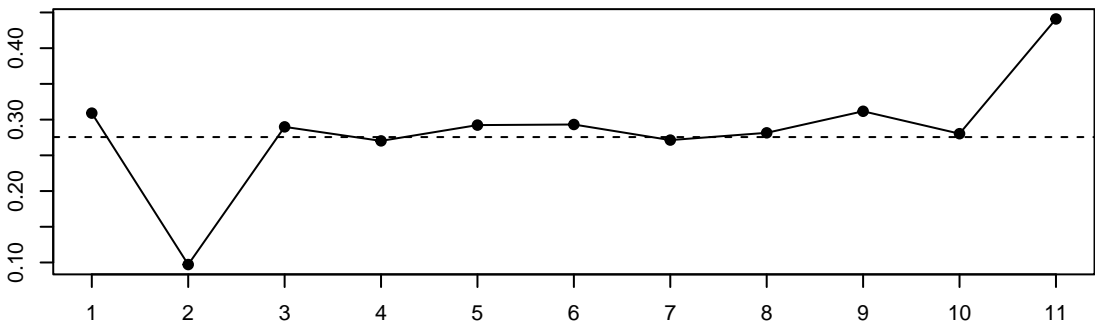**QE.del**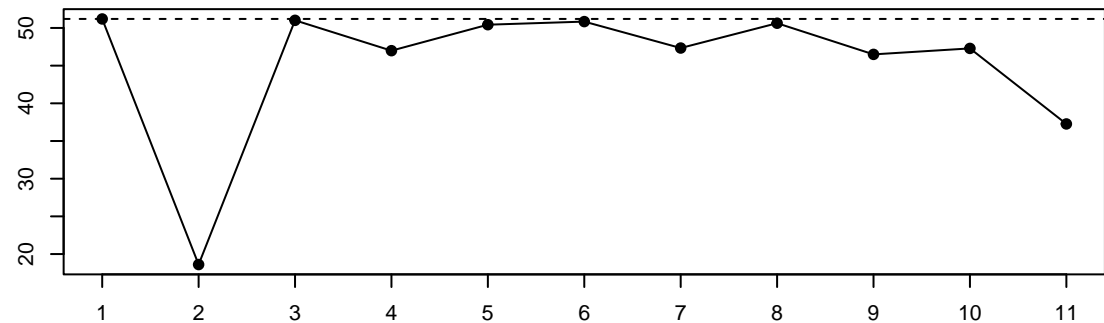**hat**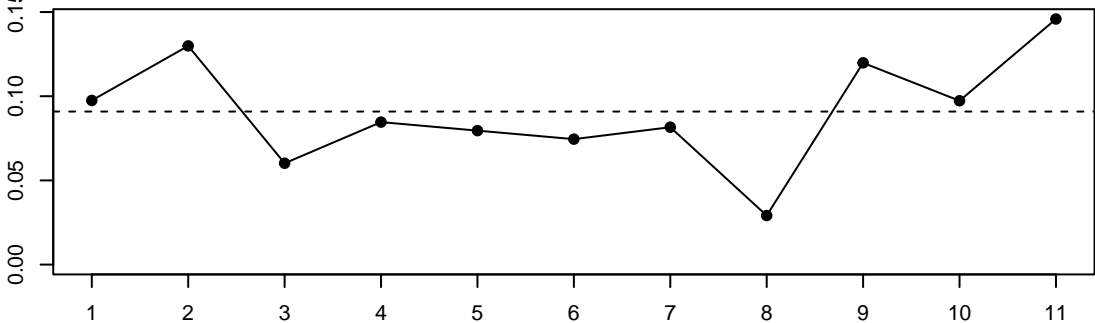**weight**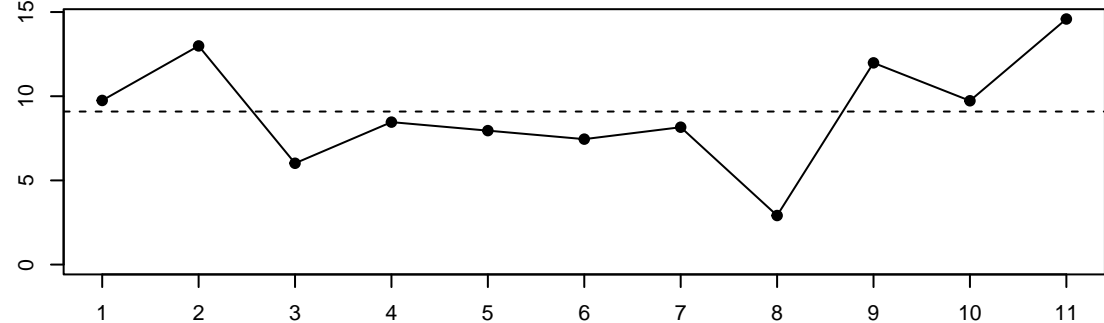

Supplement: 467_2022_5701_MOESM3_ESM.pdf [file 467_2022_5701_MOESM3_ESM.pdf]

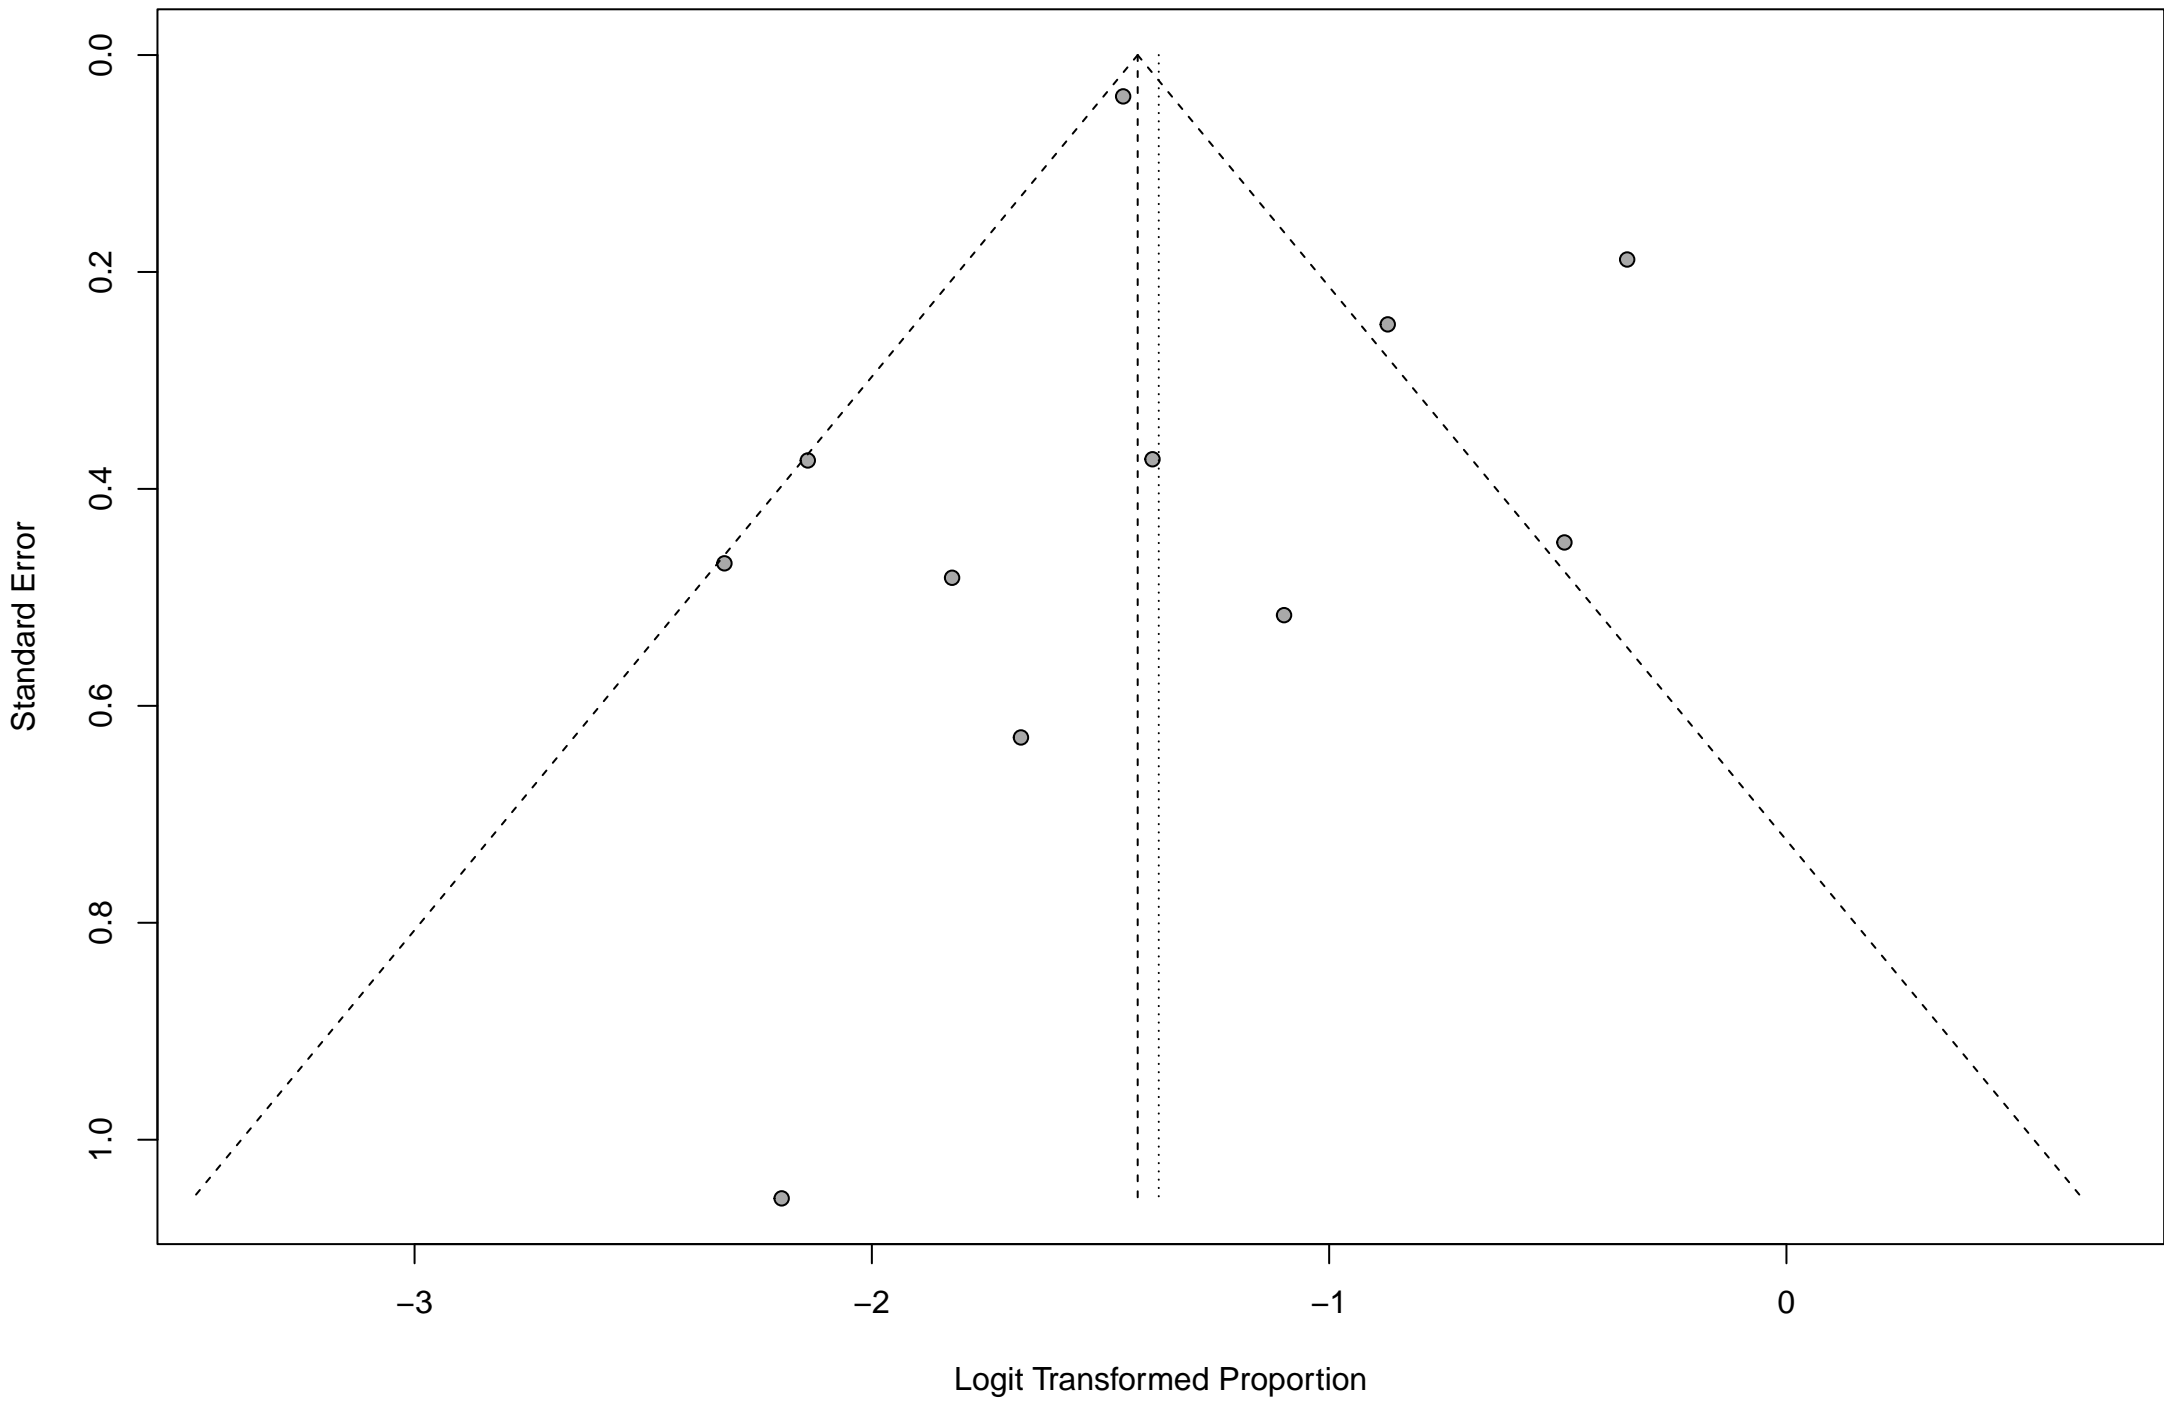

Supplement: 467_2022_5701_MOESM4_ESM.pdf [file 467_2022_5701_MOESM4_ESM.pdf]

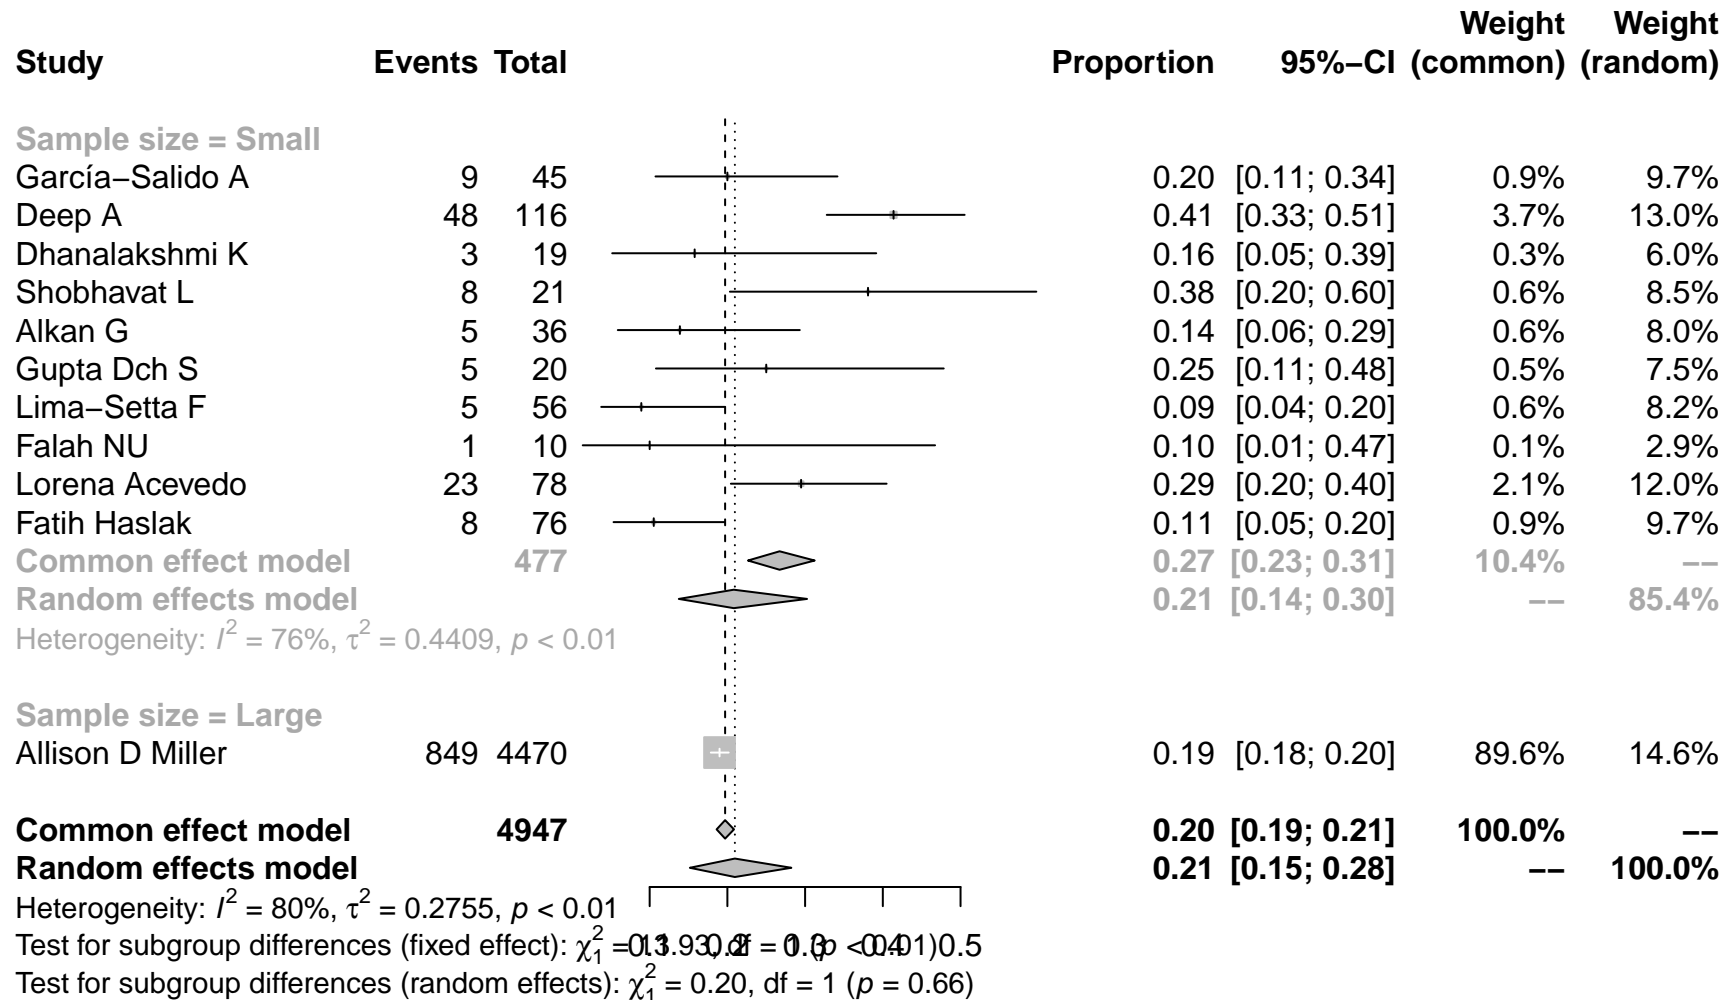

Supplement: 467_2022_5701_MOESM5_ESM.pdf [file 467_2022_5701_MOESM5_ESM.pdf]

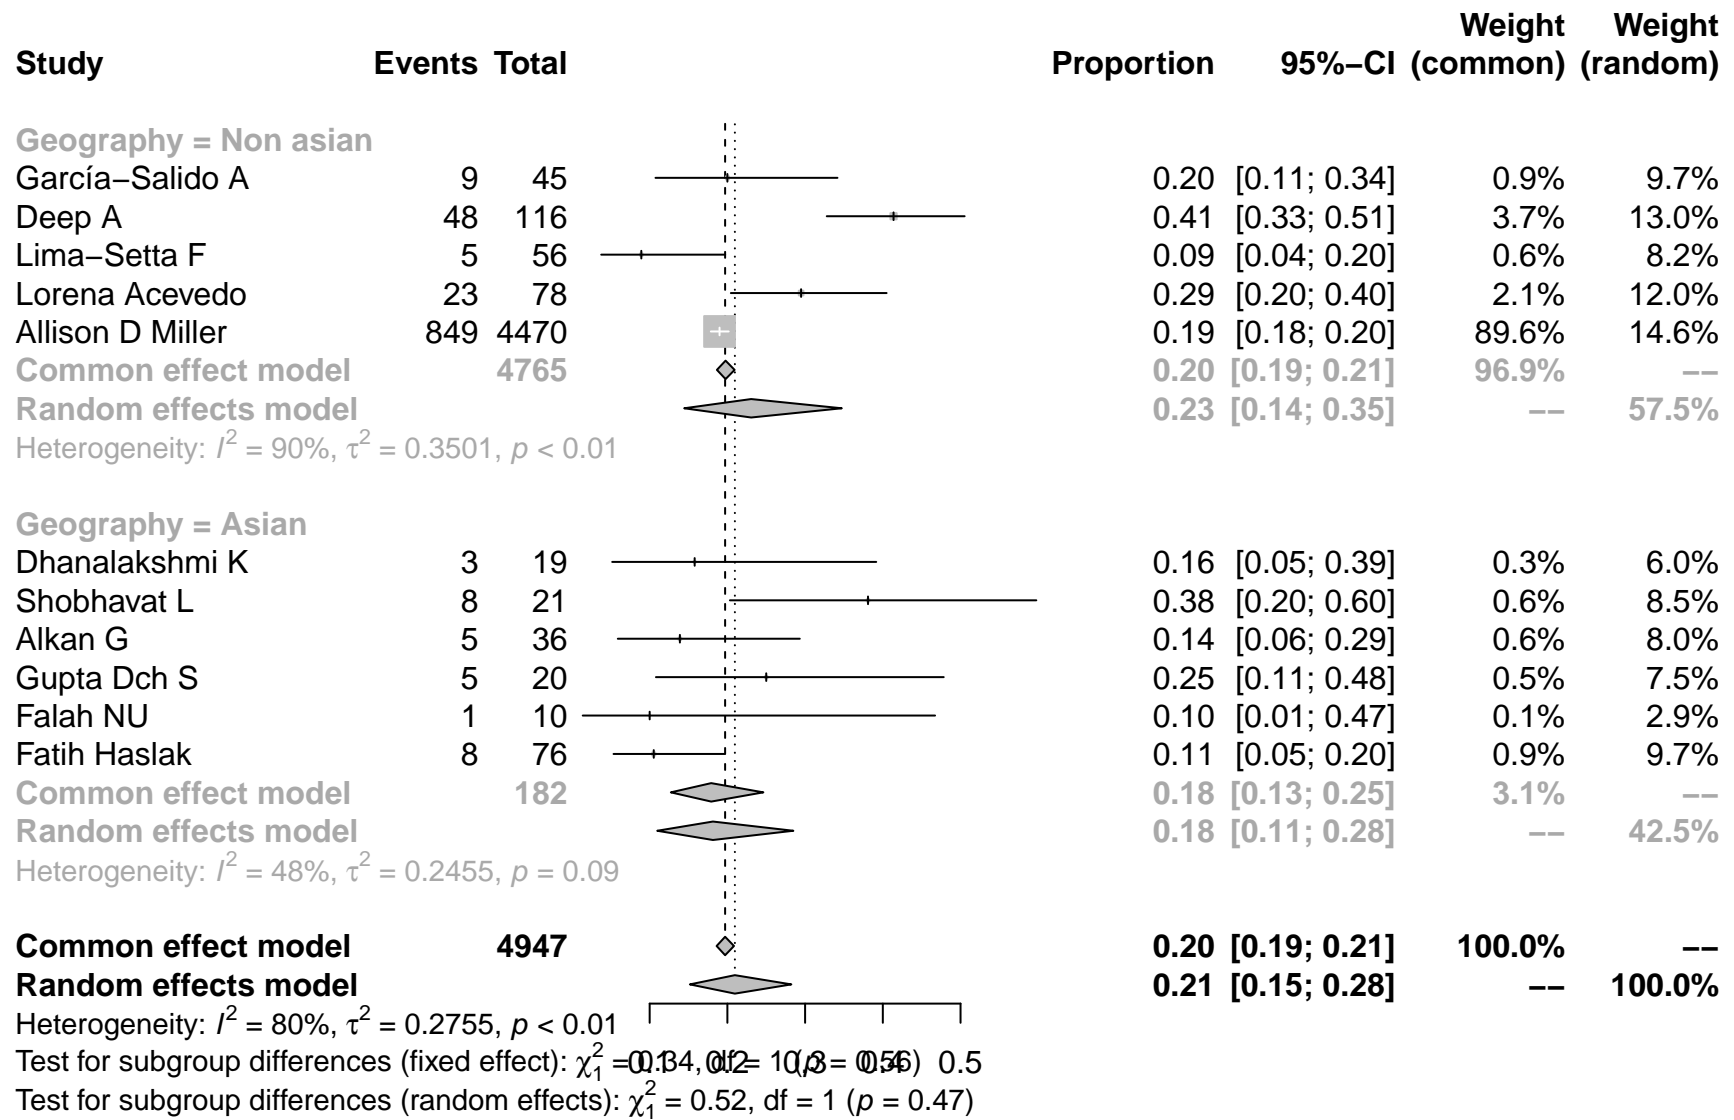

Supplement: 467_2022_5701_MOESM6_ESM.pdf [file 467_2022_5701_MOESM6_ESM.pdf]

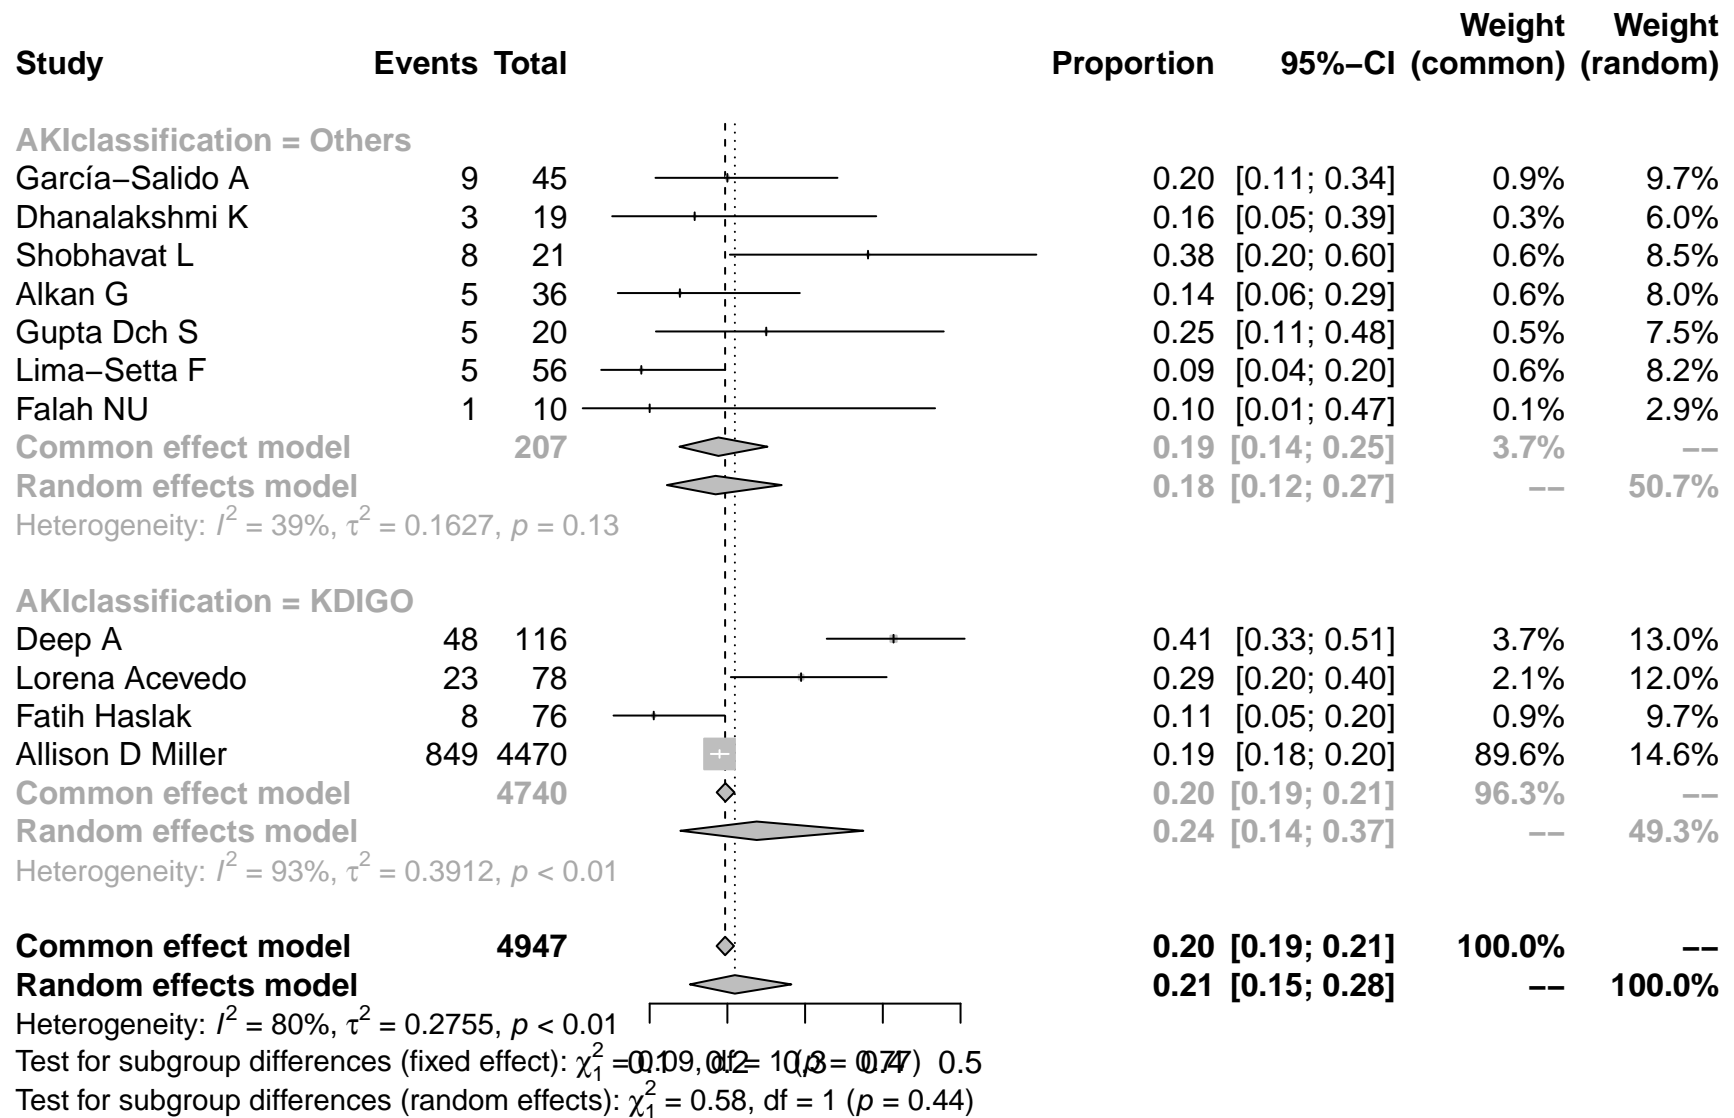

Supplement: 467_2022_5701_MOESM7_ESM.pdf [file 467_2022_5701_MOESM7_ESM.pdf]

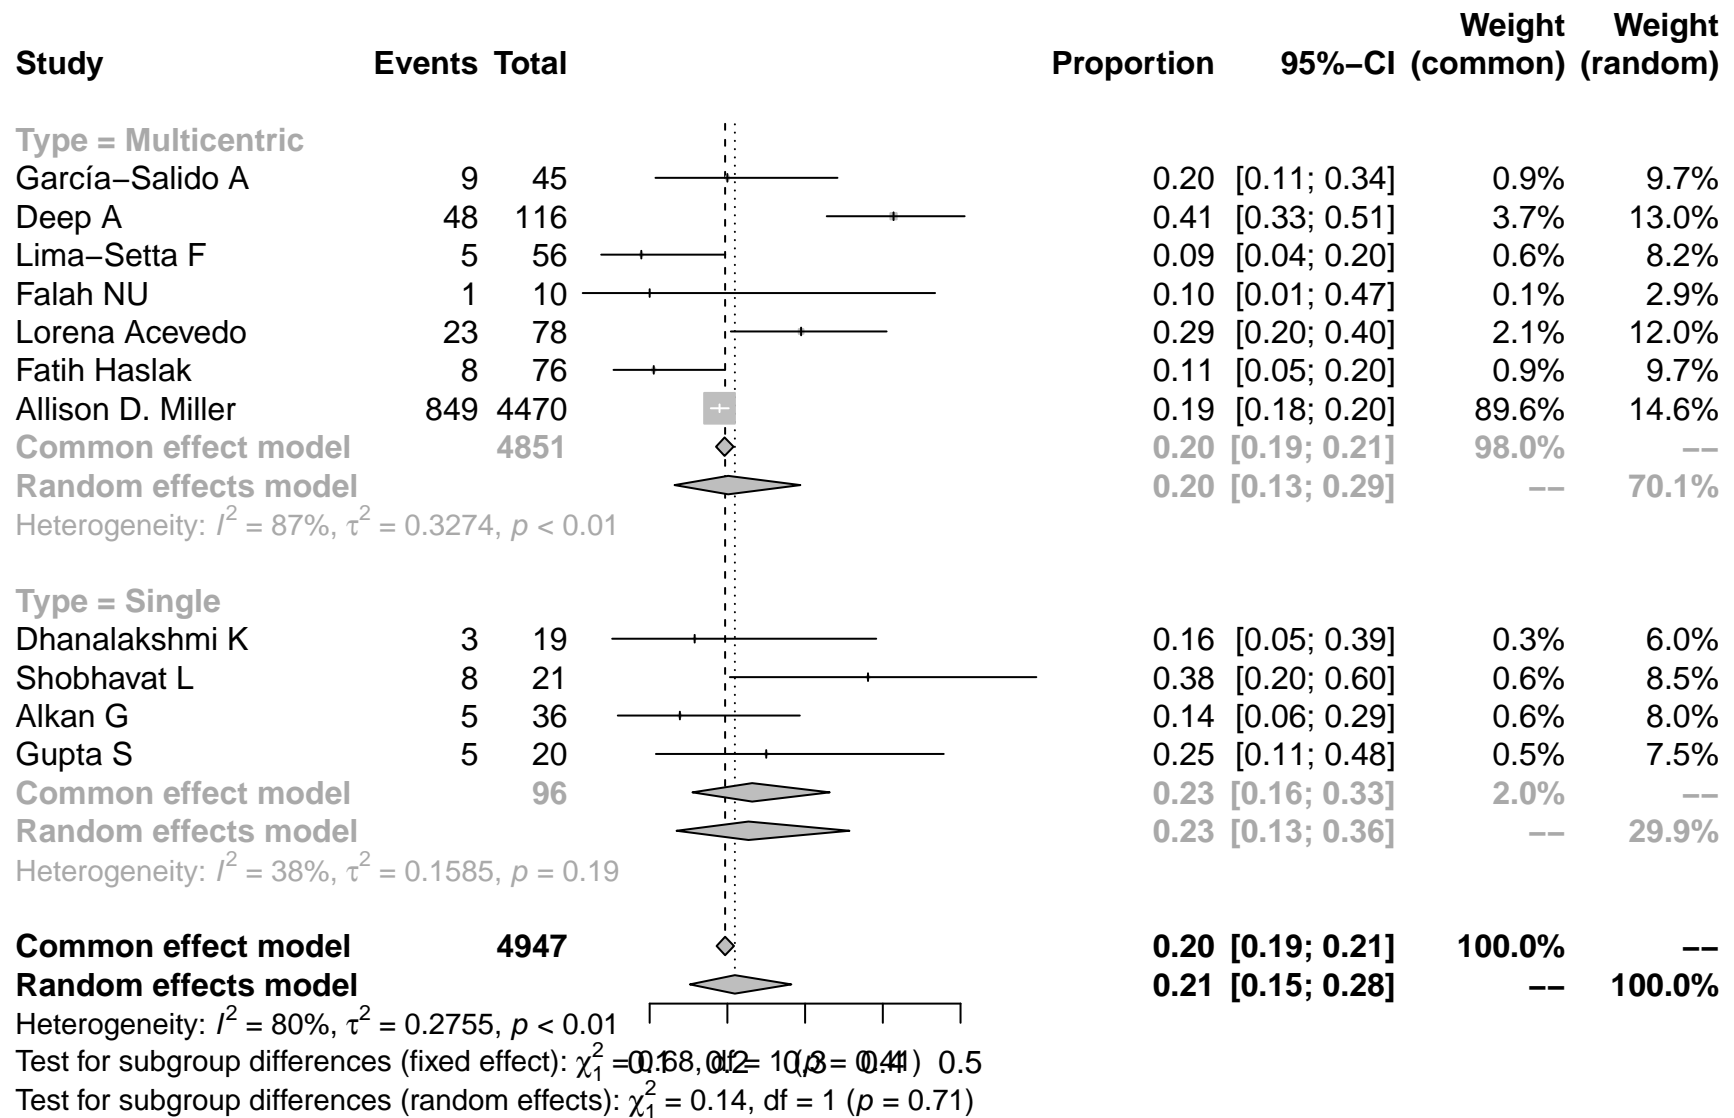

Supplement: 467_2022_5701_MOESM8_ESM.pdf [file 467_2022_5701_MOESM8_ESM.pdf]

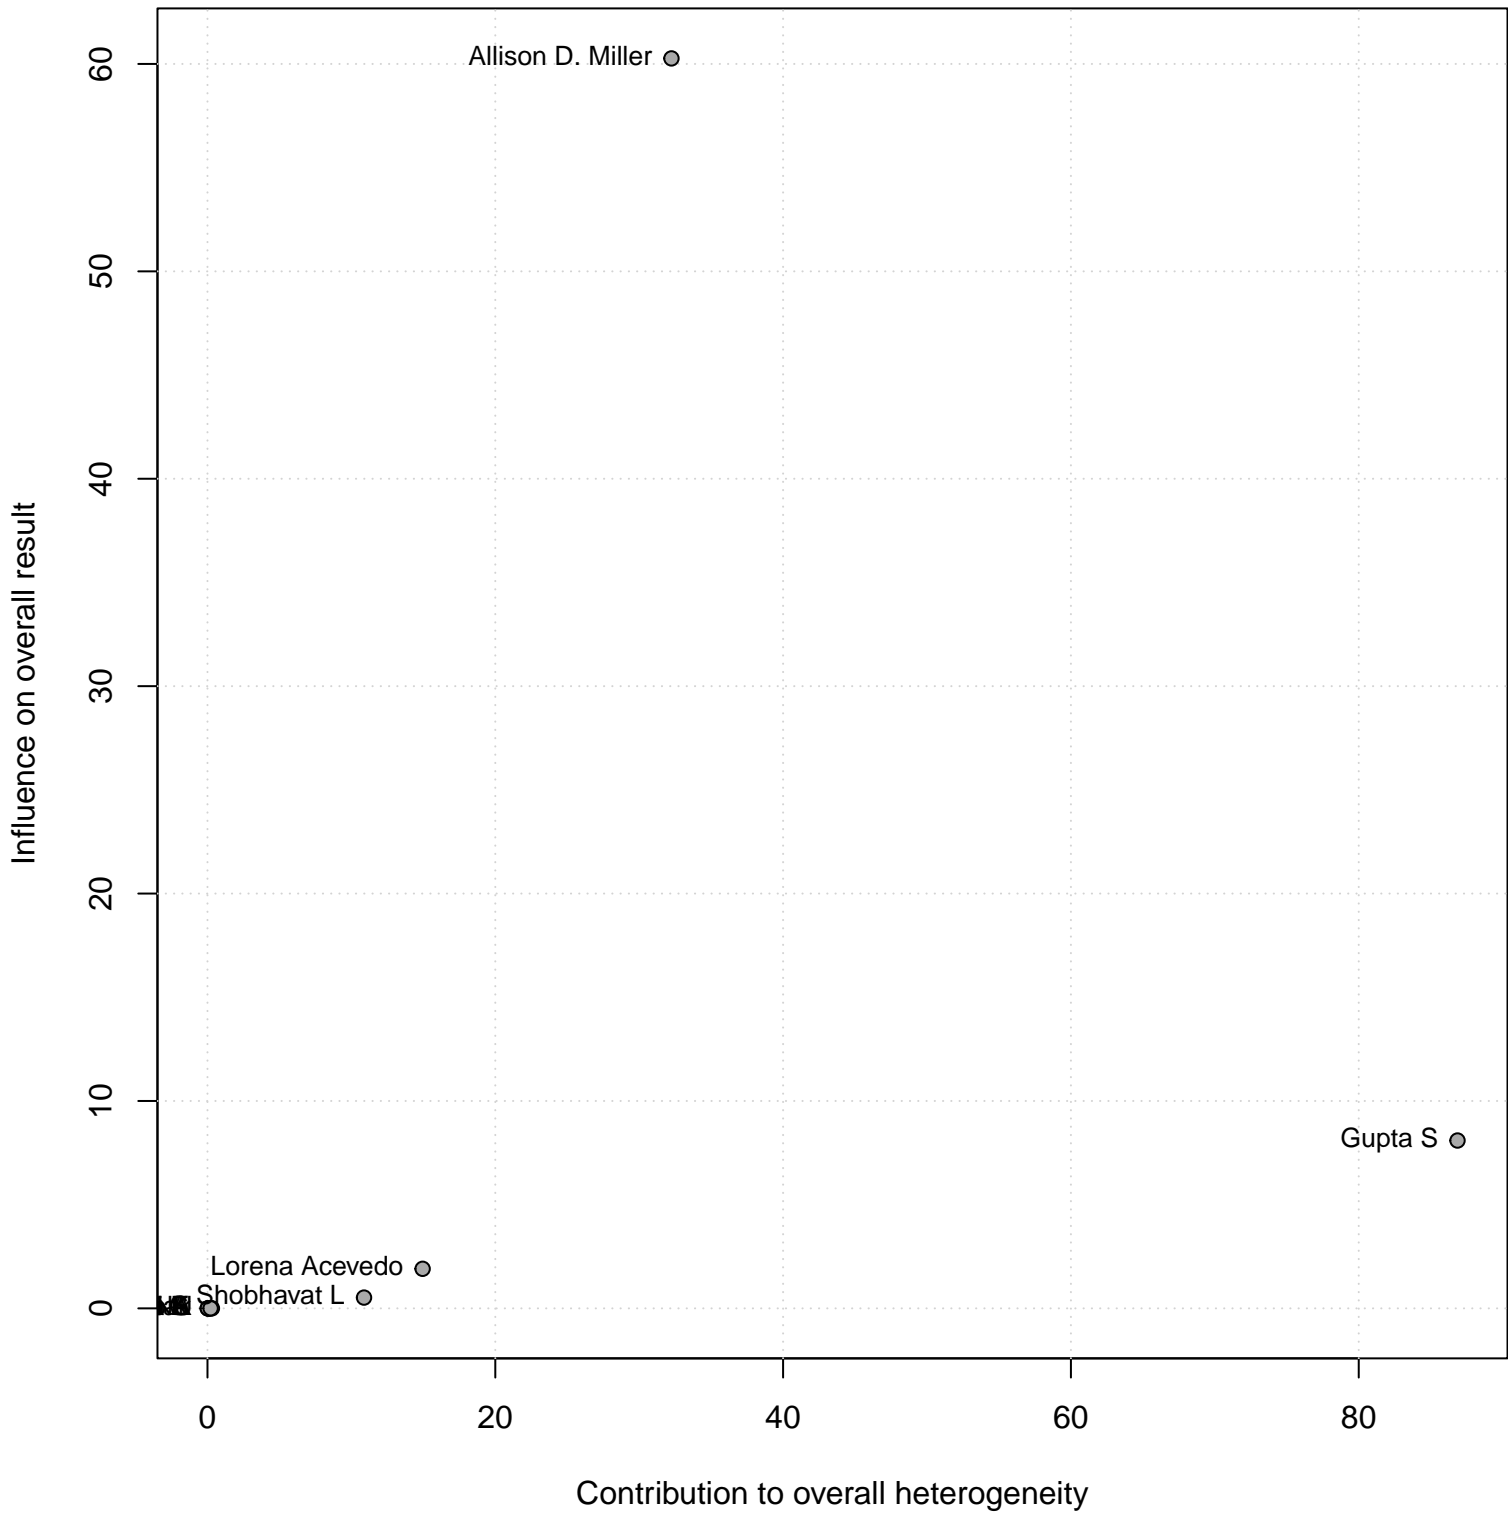

Supplement: 467_2022_5701_MOESM9_ESM.pdf [file 467_2022_5701_MOESM9_ESM.pdf]
